1 Super-resolution imaging of RAD51 and DMC1 in DNA repair foci reveals  
2 dynamic distribution patterns in meiotic prophase

3

4 Johan A Slotman<sup>2,3#</sup>, Maarten W Paul<sup>2#</sup>, Fabrizia Carofiglio<sup>1</sup>, H Martijn de Gruiter<sup>2</sup>, Tessa  
5 Vergroesen<sup>1</sup>, Wiggert A van Cappellen<sup>2</sup>, Adriaan B Houtsmuller<sup>2,3&</sup>, Willy M Baarends<sup>1&\*</sup>

6

7 1 Department of Developmental Biology, Erasmus MC - University Medical Center, PO  
8 box 2040, 3000CA, Rotterdam, The Netherlands

9 2 Erasmus Optical Imaging Centre, Department of Pathology, Erasmus MC - University  
10 Medical Center, PO box 2040, 3000CA, Rotterdam, The Netherlands

11 3 Department of Pathology, Erasmus MC - University Medical Center, PO box 2040,  
12 3000CA, Rotterdam, The Netherlands

13 #Co-first authors

14 &Co-senior authors

15 \*Author for correspondence

16

17 Short title: Super-resolution clusters of RAD51 and DMC1 in mouse meiosis

18

19 **ABSTRACT**

20

21 The recombinase RAD51, and its meiosis-specific paralog DMC1 localize at DNA double-  
22 strand break (DSB) repair sites in meiotic prophase nuclei. While both proteins are  
23 required during meiotic homologous recombination, their spatial organization during  
24 meiotic DSB repair is not fully understood. Using super-resolution microscopy on mouse  
25 spermatocyte nuclei, we aimed to define their relative position at DSB foci, and how these  
26 vary in time. We show that a large fraction of meiotic DSB repair foci (38%) contained a  
27 single RAD51 cluster and a single DMC1 cluster (D1R1 configuration) that were partially  
28 overlapping (average center-center distance around 70 nm). The majority of the rest of  
29 the foci had a similar combination of a major RAD51 and DMC1 cluster, but in combination  
30 with additional clusters (D2R1, D1R2, D2R2, or DxRy configuration) at an average  
31 distance of around 250 nm. As prophase progressed, less D1R1 and more D2R1 foci were  
32 observed, where the RAD51 cluster in the D2R1 foci elongated and gradually oriented  
33 towards the distant DMC1 cluster. This correlated with more frequently observed RAD51  
34 bridges between the two DMC1 clusters. D1R2 foci frequency was more constant, and the  
35 single DMC1 cluster did not elongate, but was observed more frequently in between the  
36 two RAD51 clusters in early stages. D2R2 foci were rare (<10%) and nearest neighbour  
37 analyses also did not reveal pair formation between D1R1 foci. In the absence of the  
38 transverse filament of the synaptonemal complex (connecting the chromosomal axes of  
39 homologs), early configurations were more prominent, and RAD51 elongation occurred  
40 only transiently. This in-depth analysis of single cell landscapes of RAD51 and DMC1  
41 accumulation patterns at DSB repair sites at super-resolution thus revealed the variability  
42 of foci composition, and defined functional consensus configurations that change over  
43 time.

44 **AUTHOR SUMMARY**

45 Meiosis is a specific type of cell division that is central to sperm and egg formation in  
46 sexual reproduction. It forms cells with a single copy of each chromosome, instead of the  
47 two copies that are normally present. In meiotic prophase, homologous chromosomes  
48 must connect to each other, to be correctly distributed between the daughter cells. This  
49 involves the formation and repair of double-strand breaks in the DNA. Here we used  
50 super-resolution microscopy to elucidate the localization patterns of two important DNA  
51 repair proteins: RAD51 and DMC1. We found that repair sites most often contain a single  
52 large cluster of both proteins, with or without one additional smaller cluster of either  
53 protein. RAD51 protein clusters displayed lengthening as meiotic prophase progressed.  
54 When chromosome pairing was disturbed, we observed changes in the dynamics of  
55 protein accumulation patterns, indicating that they actually correspond to certain repair  
56 intermediates changing in relative frequency of occurrence. These analyses of single  
57 meiotic DNA repair foci reveal the biological variability in protein accumulation patterns,  
58 and the localization of RAD51 and DMC1 relative to each other, thereby contributing to  
59 our understanding of the molecular basis of meiotic homologous recombination.

## 60 INTRODUCTION

61 During meiosis, correct homologous chromosome pairing and separation requires the  
62 repair of programmed, meiosis-specific, DNA double-strand breaks (DSBs), induced by a  
63 meiosis-specific topoisomerase type II-like complex (1-3), in species ranging from yeast  
64 to mammals. The machinery that generates and repairs the DSBs is meiosis-specific, but  
65 contains many proteins that also function in homologous recombination (HR) repair of  
66 DSBs in somatic cells (reviewed in (4)). In somatic HR (mainly active during S or G2  
67 phase), the DNA of DSBs is resected, resulting in the formation of two 3' single-strand (ss)  
68 DNA ends, coated by the ssDNA binding protein complex RPA. Subsequently, RPA is  
69 replaced by the recombinase RAD51. This enzyme forms a protein filament on the DNA  
70 and is capable of mediating strand invasion and strand displacement (D-loop formation)  
71 (5). This allows subsequent steps in repair, involving recovery of the missing information  
72 from the intact sister chromatid.

73 Meiotic DSB ends are also resected, but in addition to RPA, meiosis-specific ssDNA  
74 binding proteins also associate with the processed ssDNA ends (6, 7). RPA is then  
75 displaced by the canonical recombinase RAD51, and its meiosis-specific paralog DMC1  
76 (53.6% amino acid identity to RAD51 in mouse) (8, 9). The two recombinases appear to  
77 colocalize in mouse spermatocytes and oocytes when imaged with standard microscopy  
78 techniques (10, 11). In *A. thaliana* atRAD51 and atDMC1 have been detected as paired foci,  
79 indicating that each of the two DSB ends may be coated by a different recombinase (12).  
80 However, recent super-resolution imaging in *S. cerevisiae* has indicated that multiple  
81 small DMC1 and RAD51 filaments may accumulate on both ends of a meiotic DSB, and  
82 paired co-foci were observed at lower resolution (13). Mouse spermatocytes are very  
83 suitable for immunocytology, due to their relatively large size, and well organized  
84 patterns of chromosomal axes, that can be used to substage meiotic prophase, using

85 antibodies targeting meiosis-specific chromosomal axis proteins such as SYCP2 and  
86 SYCP3, that form the platform on which the programmed DSBs are processed (14). Here  
87 we addressed the nanoscopic localisation of RAD51 and DMC1 during mouse meiotic  
88 prophase. First, we assessed the overall distribution of RAD51/DMC1 foci in the nucleus  
89 using confocal microscopy. Next, we employed a combination of Structured Illumination  
90 Microscopy (SIM) and direct Stochastic Optical Reconstruction Microscopy (dSTORM) in  
91 two colours to visualize nanoscopic details of RAD51 and DMC1 foci in mouse meiotic  
92 prophase nuclei. We compared the localization pattern of the two recombinases in wild  
93 type spermatocytes with spermatocytes lacking the transverse filament protein SYCP1  
94 (*Sycp1*<sup>-/-</sup>). In the absence of this core component of the synaptonemal complex  
95 homologous chromosomes align but fail to synapse, resulting in the persistence of meiotic  
96 DSB repair foci (15).

97         Our results show that most repair foci contain single RAD51 and DMC1 clusters  
98 that are in close proximity to each other, with or without one much smaller additional  
99 RAD51 or DMC1 cluster at larger distance. As prophase progresses, configurations  
100 become more complex, and the major domain elongates, but this is dependent on the  
101 presence of SYCP1. One of the possible interpretations of these data may be that D1R1  
102 configurations represent filament formation on one end of a meiotic DSB, and that the  
103 distance to the other end is highly variable, precluding frequent observation of co-foci. In  
104 addition, the relatively frequent occurrence of the D2R1 and D1R2 configurations indicate  
105 that there may be stochastic variations in filament formation and/or in chromatin binding  
106 patterns of RAD51 and DMC1. This work is a first step towards unravelling the exact  
107 molecular composition of the meiotic recombination machinery in time and space in  
108 single cells.

109 **RESULTS**

110

111 **Non-random distribution of RAD51-DMC1 foci along axial elements**

112 Previous analyses performed on *S. cerevisiae* meiocytes have indicated non-random  
113 occurrence of pairs of RAD51-DMC1 co-foci (13). RAD51 and DMC1 also colocalize in  
114 easily discernible repair foci in mouse spermatocytes and oocytes (8, 11) but formation  
115 of pairs of such foci has not been described, and is also not immediately evident from the  
116 microscopic images that can be obtained (Figure 1A). In mouse, these foci are usually  
117 analysed in combination with visualization of the axial/lateral elements of the SC, since it  
118 is known that the meiotic DSBs localize along these axes. Previously, non-random  
119 distribution of markers of repair foci along the axial elements of specific chromosomes  
120 has been shown for late zygotene and pachytene spermatocytes, providing evidence for  
121 different levels of crossover interference (16-18), but such analyses have not been  
122 performed for earlier stages. To ensure nonbiased quantification of immunosignals we  
123 selected foci (using FIJI, see Materials and Methods) that were located on the  
124 chromosomal axes of leptotene and zygotene nuclei (examples of selected foci and raw  
125 images are shown in Figure 1A, C) and determined the nearest distance between RAD51  
126 and DMC1 foci, as well as the RAD51-RAD51 and DMC1-DMC1 distances (Fig. 1B, D). We  
127 counted the numbers of foci (Supplemental Figure S1A), and used these numbers to  
128 simulate random distributions of the same number of artificially generated foci along the  
129 areas covering the SYCP3 signal for each nucleus as described in Materials and Methods  
130 (see examples in Fig. 1A, C). This analysis showed that 80% (leptotene) and 67%  
131 (zygotene) of the analysed DMC1 foci on the chromosomal axes had a RAD51 neighbour  
132 at a distance shorter than 300nm (For p-values and other statistical parameters see  
133 Supplementary Figure 1B), reflecting the overall colocalization. Analyses of DMC1-DMC1

134 and RAD51-RAD51 distances also revealed a non-random distribution (Figure 1B,  
135 Supplementary Figure 1B), whereby distances between 500 and 800 nm occurred more  
136 frequently than expected. This could be explained by the fact that DSB foci are generally  
137 excluded from specific regions, such as constitutive heterochromatin and near  
138 centromeric areas, causing foci to be in closer proximity to each other than expected  
139 based on random distribution. However, the rather sharp peaks of RAD51-RAD51 and  
140 DMC1-DMC1 nearest neighbour distances around 800nm in zygotene, indicate additional  
141 non-random distribution within the DSB-foci positive SC regions.

142

### 143 **Composition of meiotic recombination foci revealed by super-resolution imaging**

144 To establish precisely how RAD51 and DMC1 accumulate relative to each other at  
145 distances smaller than 300 nm, we visualized RAD51, DMC1, and SYCP3, using SIM and  
146 dSTORM, (Figure 2A-E). By utilizing a microscope that combines SIM and dSTORM, we  
147 were able to visualise the same field-of-view applying both techniques with the same  
148 objective lens (Figure 2A, B). The SIM images were used to visualise synaptonemal  
149 complexes (SCs), to be able to identify the substage of meiotic prophase and meiotic DSB  
150 foci (also in the SIM image), which were further analysed in images acquired by dSTORM.  
151 In DMC1 and RAD51 co-staining experiments, the two proteins displayed distinct  
152 localisation patterns, both in SIM and dSTORM images (Figure 2C, D).

153 A total dataset of 2315 manually selected foci was generated by analysis of 18 nuclei in  
154 different meiotic substages, imaged in four independent experiments (Supplemental  
155 Figure S2A-C, Supplemental Table S1). The maximum number of foci per nucleus was  
156 observed in early zygotene, corresponding well with what we and others have reported  
157 previously (11, 19, 20).

158

159 **Most foci contain a major domain consisting of one RAD51 and one DMC1 cluster**

160 Many different configurations of RAD51 and DMC1 assemblies can be discerned (Figure  
161 2F). To quantify and categorize the different patterns of RAD51 and DMC1 clusters  
162 objectively, we generated binary images and identified specific RAD51 and DMC1 clusters,  
163 within the ROIs (600 nm diameter circles) (Figure 2E)(21). We quantified the number of  
164 clusters within each ROI and observed that for both RAD51 and DMC1 a single cluster  
165 within a ROI was most frequently observed (Figure 2G). Foci with multiple RAD51 or  
166 DMC1 clusters were also present, and were somewhat more frequent for DMC1 compared  
167 to RAD51 (Figure 2G). Next, we quantified the different RAD51 and DMC1 clustering  
168 combinations in our ROIs dataset in order to assess how the two recombinases relate to  
169 each other within each ROI. In the distribution of cluster combinations, 68% of the total  
170 population of ROIs fell within three specific groups: one DMC1 cluster and one RAD51  
171 cluster (D1R1, 38%), two DMC1 clusters with a single RAD51 cluster (D2R1, 18%), or two  
172 RAD51 clusters and one DMC1 cluster (D1R2, 12%) (Figure 2H). Only 6% of the foci  
173 contained 2 clusters of each recombinase (D2R2), and all other combinations occurred at  
174 lower frequencies.

175 We also analysed a mouse mutant model in which assembly of the synaptonemal complex  
176 (SC) is incomplete due to the absence of the central or transverse filament of the SC  
177 (*Sycp1*<sup>-/-</sup>, 2 animals, two independent experiments, 10 nuclei, 2042 manually selected foci  
178 (Supplemental Figure S3, Supplemental Table S1) (15). In spermatocytes from these mice,  
179 homologous chromosomes show pairing but no synapsis, and the distances between  
180 paired axial elements are larger than between lateral elements in synapsed SCs in the wild  
181 type (around 80 nm in wild type and 200 nm in the knockout) (15). In this mutant,  
182 leptotene appears normal, and the number of DSB foci observed at this stage is similar to  
183 the maximum number observed in wild type spermatocytes, but the failure to synapse



184 disturbs subsequent stages, and prevents completion of meiotic DSB repair ((15); (22-25)  
185 and Supplemental Figure S3). Overall, DxRy configurations were present in similar  
186 frequencies in wild type and *Sycp1*<sup>-/-</sup> nuclei, although D1R2 and other configurations with  
187 more than one RAD51 cluster were observed somewhat more frequently in the knockout  
188 (Figure 2G, H).

189 Next, we also classified all binary images based on the observed shapes and sizes of  
190 clusters. We frequently observed a structure consisting of a relatively large D cluster and  
191 a large R cluster with roundish shapes, that partially overlapped. (Figure 3A: “simple”).

192 If the number of D and/or R clusters was large than 1, we also frequently observed this  
193 simple structure, and the additional RAD51 and/or DMC1 clusters were then usually  
194 smaller than the two main D and R clusters. This simple structure was less frequently  
195 observed in zygotene- and pachytene-like *Sycp1*<sup>-/-</sup> spermatocytes (Figure 3B).

196 A combination of more complex partially overlapping shapes of a major D and major R  
197 domain was also frequently observed in both wild type and *Sycp1*<sup>-/-</sup> spermatocytes  
198 (Figure 3A: “complex”). Again, additional clusters were usually relatively small compared  
199 to the two main clusters. Together, these so-called simple and complex foci comprised the  
200 majority of all configurations in both wild type and *Sycp1*<sup>-/-</sup> nuclei. This indicated that the  
201 D1R1 foci could actually be representative for a much larger fraction of the DnRn foci if  
202 the small additional clusters were considered “satellites”.

203 A notable structure that was observed for D1R2, D2R1, and ROIs containing more clusters,  
204 was termed “bridge” (Figure 3A “bridges”, 13% of all foci in wild type and 19% in *Sycp1*<sup>-/-</sup>).  
205 These contained 2 D clusters that were connected by one R cluster (D2R1 bridge), or  
206 the reverse situation (D1R2 bridge), with or without additional clusters. D2R1 bridge  
207 frequency increased as prophase progressed in the wild type, but not in the *Sycp1*<sup>-/-</sup>.

208 spermatocytes (Figure 3B). Conversely D1R2 bridges were observed more frequently in  
209 zygotene- and pachytene-like *Sycp1*<sup>-/-</sup> spermatocytes compared to wild type (Figure 3B).  
210 Special attention was given to the occurrence of what could be considered as paired  
211 configurations; a twin set of overlapping RAD51 and DMC1 clusters (Figure 3A: “paired”  
212 and Supplemental Figure S4). These should be mostly represented in the D2R2 subgroup.  
213 However, only 34 of the total of 142 D2R2 foci in the wild type have a “paired” appearance  
214 (Supplemental Figure S4). The overall frequency of paired configurations increased as  
215 prophase progressed in both wild type and *Sycp1*<sup>-/-</sup> spermatocytes, but never exceeded  
216 6% of the total (Figure 3B).  
217 Finally, a small rather constant fraction of the foci contained only separate RAD51 and  
218 DMC1 clusters (Figure 3A: “separate”, and 3B). Given the high relative frequencies of the  
219 D1R1, D2R1 and D1R2 configurations in both wild type and *Sycp1*<sup>-/-</sup> spermatocytes, we  
220 investigated these configurations in more detail.

221

222

### 223 **Temporal analysis of D1R1, D2R1, and D1R2 configurations during meiotic** 224 **prophase**

225 In wild type nuclei, the D1R1 configuration was the most abundant configuration at  
226 leptotene, suggesting that this is an early configuration (Fig. 4A). In the transition to  
227 zygotene in the wild type, a reduction of the relative D1R1 configuration frequency was  
228 observed, parallel to a 2-fold increase in the relative frequency of D2R1 foci. In contrast,  
229 the relative D1R2 frequency remained constant. In *Sycp1*<sup>-/-</sup> spermatocytes, the absolute  
230 and relative D1R1 configuration frequency decreased only transiently in zygotene, and  
231 cells that reached a pachytene-like stage displayed D1R1 foci at a frequency that was  
232 similar again to what was observed for leptotene nuclei (Fig 4B). The frequency of D2R1

233 foci remained constant during the different analysed stages of the *Sycp1* knockout (Figure  
234 4B), whereas the D1R2 configuration frequency increased as prophase progressed.  
235 Interestingly, this configuration was the only one that appeared to localize preferentially  
236 on unsynapsed axes in wild type zygotene nuclei (Figure 4C).  
237 In general, we did not observe any overt specific distribution pattern of the different  
238 configurations relative to each other along the SC at the different stages of meiotic  
239 prophase (Supplemental Figure S5A).

240

#### 241 **Asymmetrical distribution of RAD51 and DMC1 relative to each other in D2R1 and** 242 **D1R2 configurations**

243 To investigate the spatial organization of protein clusters in the most frequently occurring  
244 configurations further (D1R1, D2R1 and D1R2), we determined the center of mass of  
245 every cluster in each ROI and measured the distance between the center of RAD51  
246 cluster(s) and DMC1 cluster(s) (Figure 5A, B). Interestingly, minimum distances  
247 coherently clustered at approximately 70 nm (wild type/*Sycp1*<sup>-/-</sup>  
248 ;68.4±1.2sem/75.8±1.1sem) for all analysed foci configurations in wild type and *Sycp1*  
249 knockout nuclei. Thus, almost all foci that contain more than one RAD51 and/or DMC1  
250 cluster, contain at least one RAD51 and one DMC1 cluster in close proximity to each other,  
251 with an average distance of approximately 70nm (Figure 5A). Since only a single cluster  
252 is present for each of the individual recombinases in the D1R1 group, the distribution of  
253 the maximum distance was the same as for the minimum distance. Importantly, it  
254 completely overlapped with the first peak of the distribution of maximum distances of all  
255 configurations, suggesting that all foci with more than one RAD51 and/or DMC1 cluster,  
256 also contain RAD51 and DMC1 clusters that are larger (localisations are more spread) or

257 that are spatially more separated from each other, with an average distance of around 300  
258 nm (wild type/*Sycp1*<sup>-/-</sup>; 287.4±2.7sem/308.6±2.8sem) (Figure 5B).

259 This observation of asymmetry allowed us to define close and far clusters in both the  
260 D2R1 and the D1R2 configurations. Interestingly, we observed a large close cluster and a  
261 small far cluster irrespective of whether two RAD51 or two DMC1 clusters were present  
262 (Fig. 5C-E). Thus, the measured larger distance between the two DMC1 or RAD51 clusters  
263 in the D2R1 and D1R2 configurations can be interpreted as more spatial separation. DMC1  
264 area sizes of the close clusters and single clusters are all rather similar in wild type nuclei,  
265 and the same holds true for close and single RAD51 clusters. Still, the areas of these large  
266 clusters were transiently somewhat decreased in the D1R1 and D2R1 configurations. In  
267 addition, the far-DMC1 cluster in the D2R1 displayed a small but gradual increase in size  
268 as meiotic prophase progressed. Of note, RAD51 area sizes and DMC1 area sizes did not  
269 change during prophase for the D1R2 configuration.

270 In *Sycp1*<sup>-/-</sup> spermatocytes, no consistent patterns in area size changes as prophase  
271 progressed were apparent (Figure 5C-E).

272

### 273 **Consensus patterns of the spatial organization in D1R1, D2R1 and D1R2 foci**

274 One factor that will contribute to the observed variation in the organization of the  
275 individual images is the representation of three-dimensional structures onto a two-  
276 dimensional image. To obtain more insight in the actual structure of the three main DxRy  
277 configurations, we used alignment by rotation to be able to detect possible consensus  
278 patterns in D1R1, D2R1, and D1R2 foci (Figure 6, 7). For the D1R1 group, the DMC1  
279 cluster was used as an anchor point and the RAD51 cluster was used for the rotation. We  
280 rotated the structures so that the center of the RAD51 cluster was aligned along the  
281 vertical axis above the DMC1 cluster. Then we generated a single fused image of all aligned

282 foci, pooled from the nuclei that were at a specific stage of meiotic prophase. We observed  
283 that the RAD51 and DMC1 cluster partially overlap, but that the degree of overlap  
284 decreases while meiosis progresses, while the distance between the two clusters  
285 increases (Fig. 6A,C). In *Sycp1*<sup>-/-</sup> D1R1 foci, the degree of overlap was also reduced at the  
286 zygotene-like stage, relative to the leptotene-like stage, but increased again at pachytene  
287 (Figure 6B). Accordingly, the RAD51-DMC1 distance increases only transiently at the  
288 zygotene-like stage (Figure 6C). We observed no differences in distances between clusters  
289 within configurations on synapsed versus unsynapsed axes (Supplemental Figure S5B).  
290 For D2R1 we used the close DMC1 cluster as anchor, and first rotated the RAD51 cluster  
291 along the vertical axis. The resultant locations of the signals of the far-DMC1 cluster were  
292 then highly variable at leptotene, but formed a crescent moon-shaped structure around  
293 the other two clusters in zygotene and pachytene nuclei (Fig. 6A). As meiotic prophase  
294 progresses, the far-DMC1 cluster is more and more localised in a smaller region above the  
295 close-DMC1 cluster and the RAD51 cluster, showing that a relatively large fraction of the  
296 D2R1 foci has a DMC1-RAD51-DMC1 type of structure. We then aligned the two DMC1  
297 clusters and assessed the RAD51 location relative to the two DMC1 clusters by quantifying  
298 the relative number of RAD51 localisations present in four quarters (above, below, left  
299 and right) of the image, relative to the close-DMC1 cluster. As expected, based on the  
300 results of the rotation with the far-DMC1 cluster, the highest percentage of the RAD51  
301 signal was observed between the two DMC1 clusters, and more signal accumulated in the  
302 upper part of that quadrant as prophase progressed (Fig. 6A). In agreement with this  
303 observation, the center of mass of the RAD51 cluster seemed to be extending away from  
304 the closest DMC1 anchor cluster as cells progressed from zygotene to pachytene (Figure  
305 6D). The mean distance between the two DMC1 clusters, and between the RAD51 and the  
306 far-DMC1 cluster in the D2R1 decreased as prophase progressed, but increased again in

307 pachytene (Figure 6E, F). Overall, the consensus patterns in *Sycp1*<sup>-/-</sup> spermatocytes were  
308 similar, but the configurations were more variable (Figure 6B-F). For example, the  
309 directionality of RAD51 towards the far DMC1 cluster was clear at the zygotene-like stage,  
310 but lost at pachytene-like. Furthermore, in the analyses of the distances between the  
311 clusters of the D2R1 configurations, the distance between the close-DMC1 cluster and  
312 RAD51 initially appeared larger compared to the wild type, and increased more when  
313 cells developed from leptotene to zygotene, but in pachytene-like *Sycp1*<sup>-/-</sup> spermatocytes,  
314 the distance was similar to what was observed at leptotene. The distance of the far-DMC1  
315 cluster to RAD51 or to the close-DMC1 cluster was large at all stages, in contrast to the  
316 reduction observed during zygotene in the wild type (Figure 6B, E-F).

317 Finally, we performed the same rotation experiments for the D1R2 configuration.  
318 Interestingly, the overall organization of this configuration appeared very similar to the  
319 D2R1, including distances between clusters (Compare Fig. 6 to Fig. 7). However, in  
320 contrast to the most clear DMC1-RAD51-DMC1 organization of the D2R1 occurring in  
321 pachytene, already in early zygotene the single DMC1 cluster of D1R2 was most clearly  
322 located between the two RAD51 clusters (Figure 7A), and the DMC1 distance to the close  
323 RAD51 was already maximal at early zygotene. No significant change in the distance to  
324 the far RAD51 cluster, or between the RAD51 clusters was observed (Figure 7C-E). This  
325 corresponds well to the early versus late appearance of the D1R2 and D2R1 bridged  
326 structures, respectively (Figure 3B). In *Sycp1*<sup>-/-</sup> spermatocytes, DMC1 localized more  
327 clearly in between the two RAD51 domains, and this was maintained in the pachytene-  
328 like nuclei. However, the signal accumulation in the summed rotated images extended less  
329 far in the direction of the far RAD51 cluster compared to the wild type (Figure 7A, B). The  
330 increase in distance between the DMC1 and close RAD51 cluster was observed only  
331 transiently, in zygotene (Figure 7C).

332

### 333 **Three-dimensional simulations of the D2R1 configuration**

334 Next, we simulated a 3D model of D2R1 configurations as described in Materials and  
335 Methods (Figure 8A). We analysed the simulated data (discarding the z information) in  
336 the same way as the experimental data. Interestingly, around 15% of the simulated D2R1  
337 configurations in a three-dimensional space are represented as D1R1 in the two-  
338 dimensional representations, and also a small fraction of D3R1 and D2R2 configurations  
339 were observed for simulated D2R1s. This is most likely caused by situations whereby  
340 spurious detections rise just above the background, resulting in detection of an additional  
341 cluster. We performed rotation and alignment on the simulated D2R1 configurations in  
342 the dataset, as described above for the observed real foci. Strikingly, it can be observed  
343 that the simulated data fits best to the experimental data set if the degree of freedom for  
344 the angle gradually reduces from 132° to 105° and the length of RAD51 gradually  
345 increases from 80 to 144 nm going from leptotene to pachytene (Fig. 8C,D). Comparing  
346 the simulations to the *Sycp1*<sup>-/-</sup> D2R1 rotations, it appears that the degree of rotation  
347 freedom for the close-DMC1-RAD51 cluster combination relative to the DMC1-DMC1 axis  
348 is larger than in wild type at the leptotene-like and pachytene-like stages, but actually  
349 more restricted in the zygotene-like nuclei, for which a maximal rotation angle of 105 and  
350 a length of 144 nm fitted best.

351

### 352 DISCUSSION

353 We simultaneously determined the localisation of the recombinases RAD51 and DMC1 at  
354 nanoscale resolution in more than 4000 DSB foci in 18 wild type and 10 *Sycp1*<sup>-/-</sup>  
355 spermatocytes. We distinguished early, intermediate and late stages of meiotic prophase  
356 by co-staining of the synaptonemal complex. Together, this allowed us to reconstruct

357 generalised RAD51 and DMC1 distribution patterns within repair foci as progress through  
358 meiotic prophase.

359 RAD51 and DMC1 filaments are expected to form elongated structures, based on super-  
360 resolution images of RAD51 in somatic cells (26, 27). The maximal length of the RAD51  
361 and DMC1 clusters in all observed configurations reached an average of around 140 nm  
362 in pachytene, based on our simulations, but the maximal length of the most stretched  
363 RAD51 or DMC1 clusters was found to be around 250-300 nm. This is comparable to  
364 observed elongated RAD51 structures in fixed somatic cells using dSTORM (26). Haas et  
365 al., (27) observed an average maximal length of RAD51 clusters of around 160nm, more  
366 similar to the average simulated length observed.

367 The resolution is limited by the sizes of the first and second antibodies, which is expected  
368 to add around 20-40 nm in X and Y direction in our 2D images (28, 29). An *in vitro* filament  
369 of RAD51 with a length of 100 nm covers approximately 200 bp of ssDNA (30). Given the  
370 current estimates of ssDNA track lengths in meiotic recombination (~500-1000 bp (31)),  
371 it seems reasonable that most of what we observe would represent actual binding of the  
372 recombinases to ssDNA, however our data also suggests that neither RAD51 or DMC1  
373 cover the entire resected DNA in an fully extended filament. Furthermore, we certainly  
374 cannot exclude that some clusters represent (transient) associations with chromatin, or  
375 with dsDNA.

376

377 **A close association of a large RAD51 and DMC1 cluster as predominant**  
378 **configuration in DSB repair foci.**

379 Since the D1R1 configuration was observed most frequently, and similar structures were  
380 also the major component in more complex cluster combinations, the D1R1-configuration  
381 represents the main form of RAD51 and DMC1 accumulation at DSB foci. The D1R1



382 configuration may represent asymmetric loading of each recombinase to one of the two  
383 ends of the DSB, or represent loading of both on only one end of a DSB. We hardly  
384 observed situations that could be considered paired D1R1 configurations, contrary to  
385 what might be expected based on observations in yeast (13), and from the symmetric  
386 loading of DMC1 observed in ChIP-seq data of meiotic hotspots (32). Therefore, it appears  
387 likely that if D1R1 configurations represent a single end of the DSB, the other end would  
388 be mostly occupied by other proteins, or the distance to the other (D1R1) end would be  
389 larger than 500nm, and highly variable, precluding visible pairing of D1R1 structures. A  
390 combination of these two situations may also occur.

391

392 **D2R1 and D1R2 represent DSB intermediates with asymmetric loading of RAD51**  
393 **and DMC1**

394 The similarity of the DMC1 and RAD51 clusters that are closest to each other in D2R1 and  
395 D1R2 to the D1R1 configurations in terms of size and proximity, and the decreasing  
396 frequency of the latter, together suggest that the D1R1 may evolve into a D2R1 or D1R2  
397 configuration. The additional cluster at longer distance from the main DMC1-RAD51  
398 entity could then result from new loading of DMC1 or RAD51, or from splitting of the  
399 respective cluster into two independent clusters that stabilizes at a distance of 200-250  
400 nm.

401 The maximum area of the far RAD51/DMC1 cluster is more than 10-fold smaller than the  
402 areas occupied by the adjacent close DMC1 and RAD51 clusters. So, either the far clusters  
403 may be somehow compacted, or represent binding of recombinase to a shorter stretch of  
404 (ss)DNA or chromatin. It is interesting to note that in the protist Tetrahymena, it has been  
405 suggested that RAD51 filaments are extremely small, forming no visible foci, whereas  
406 DMC1 foci are observed and both proteins are required for functional processing of the

407 meiotic DSBs (33). Although this appears to be an example of extremely asymmetric  
408 behaviour of RAD51 and DMC1, our current observations suggest that such small  
409 filaments of either RAD51 or DMC1 may also form in other eukaryotes.

410 Similar to the D1R1, the large close DMC1 and RAD51 clusters in D2R1 and D1R2 may  
411 represent binding to the same DNA (single-stranded or double stranded) molecule, or to  
412 the different ends of the DSB. The fact that the distances of the two close clusters, to the  
413 far cluster in D1R2 and D2R1 foci are very similar in these two configurations supports  
414 the idea that there is some form of physical coupling between the D1R1 moiety and the  
415 additional RAD51 (D1R2) or DMC1 (D2R1) cluster, and also that the D2R1 and D1R2  
416 configuration represent similar chromatin/DNA conformations/repair intermediates.  
417 The “bridged” structures that were observed for both D1R2 and D2R1 also support this  
418 notion. The D2R1 bridge was observed mainly in pachytene. This structure, as well as its  
419 timing are recapitulated by the lengthening of the RAD51 domain, and increased  
420 frequency of DMC1-RAD51-DMC1 alignment as prophase progresses in the rotation  
421 analyses. D1R2 bridges were found as more early structures, that preferentially locate on  
422 unsynapsed chromatin.

423

424 **The number and organization of the RAD51 and DMC1 cluster combinations are**  
425 **affected in *Sycp1*<sup>-/-</sup> spermatocytes**

426 Our high-resolution analyses revealed an increased frequency of D1R1 configurations in  
427 the pachytene-like *Sycp1*<sup>-/-</sup> nuclei compared to zygotene-like nuclei. Recent data indicate  
428 that when synapsis is not achieved, feedback mechanisms may act locally to maintain  
429 SPO11 activity in unsynapsed regions (34-36), which is in agreement with the increased  
430 frequency of early recombinase configurations in late-stage *Sycp1*<sup>-/-</sup> spermatocytes. We  
431 also observed an increased frequency of D2R1 configurations in leptotene-like nuclei, in

432 comparison to the wild type, which can be attributed to the fact that when a true synapsed  
433 structure cannot be formed, initial alignment and pairing will be less stable, and cells that  
434 should be in zygotene will still appear as leptotene in the *Sycp1*<sup>-/-</sup> nuclei. The results of the  
435 rotation analyses and distance measurements throughout prophase in the knockout  
436 indicate that the D2R1 configuration initially appears to form and proceed as normal, but  
437 then a destabilization occurs, leading to frequencies of the D2R1 and D1R2 foci at  
438 pachytene-like stage that are more similar to those observed in wild type leptotene cells.  
439 This also fits well with a clear increase in D1R2 bridges observed in *Sycp1*<sup>-/-</sup> nuclei. It is  
440 tempting to speculate that in the absence of SYCP1, the lack of SC formation favours D1R2  
441 structures, and that this is somehow coupled to reduced D2R1 formation/stability. In  
442 addition, the data support the previously reported longer persistence of DSB induction.

443

#### 444 **Concluding remarks**

445 Our super-resolution dual colour dSTORM approach allowed direct comparison of the  
446 localization of RAD51 and DMC1 relative to each other. We provide the first evidence for  
447 the presence of a major structure consisting of a single relatively large cluster of both  
448 RAD51 and DMC1 in close proximity to each other in the majority of mouse meiotic DSB  
449 repair foci. Additional, usually smaller clusters of either recombinase are often present,  
450 and the fact that the total number of nonoverlapping clusters exceeds two in ~20% of the  
451 foci indicates that some clusters represent binding to dsDNA, or chromatin, or  
452 background, since maximally two DSB ends are expected to be available for binding  
453 within a single ROI. We favour the hypothesis that the D1R1 configuration mostly  
454 represents formation of two adjacent filaments of RAD51 and DMC1 on the same  
455 molecule. This then automatically suggests that one DSB end is often not bound by the  
456 recombinases, or epitopes are hidden due to differential conformations of the two ends,

457 or the two ends are far apart, with a wide variety in distances, precluding visible  
458 formation of paired co-foci.

459 This single-cell, and single repair focus approach revealed that there is enormous variety  
460 in the types of structures formed, in a more or less stochastic manner. We suggest that  
461 regulatory mechanisms act to stabilize or destabilize certain structures to eventually  
462 allow progression of repair using either the sister chromatid or homologous chromosome  
463 at each site, depending on local constraints. Configurations that we observe at low  
464 frequencies may still be functionally relevant, and further studies will be required to  
465 explain the observed structures in terms of actual repair intermediates. These may  
466 involve three-dimensional super-resolution imaging of repair proteins in combination  
467 with visualization of DNA. In addition, the experimental combination of meiosis-defective  
468 knockout mouse models with super-resolution microscopy provides a promising new  
469 approach to study the dynamics of mouse meiotic recombination and meiotic defects at  
470 the molecular level.

471

## 472 MATERIALS AND METHODS

### 473 *Animals*

474 Two wild type (5-10 weeks old) and two *Sycp1* knockout (12 weeks old) mice (previously  
475 described (15)) were killed using CO<sub>2</sub>/O<sub>2</sub>. All animal experiments were approved by the  
476 local animal experiments committee DEC Consult and animals were maintained under  
477 supervision of the Animal Welfare Officer.

478

### 479 *Meiotic spread preparation and immunofluorescence*

480 Spread nuclei for immunocytochemistry and confocal analyses were prepared as  
481 described (37). For dSTORM and 3D-SIM analyses the same method was used, but cells

482 were spread on 1.5 thickness high-precision coverslips ( $170\pm 5$   $\mu\text{m}$ ), previously coated  
483 with 1% poly L-lysine (Sigma). Slides were immunostained with the antibodies described  
484 below in 2 experiments to collect images for the nearest neighbour analyses. Coverslips  
485 were stained with antibodies mentioned below in six separate staining experiments for  
486 dSTORM and 3D-SIM analyses as follows:

487 -Four experiments to collect the images of the 18 nuclei presented in Supplemental Figure  
488 S2

489 -Two experiments to collect the images of 10 *Sycp1* knockout nuclei presented in  
490 Supplemental Figure S3

491 Before incubation with antibodies, slides or coverslips were washed in PBS (3x10 min),  
492 and non-specific sites were blocked with 0.5% w/v BSA and 0.5% w/v milk powder in  
493 PBS. Primary antibodies were diluted in 10% w/v BSA in PBS, and incubations were  
494 overnight at room temperature in a humid chamber. Subsequently, slides or coverslips  
495 were washed (3x10 min) in PBS, blocked in 10% v/v normal swine serum (Sigma) in  
496 blocking buffer (supernatant of 5% w/v milk powder in PBS centrifuged at 14,000 rpm  
497 for 10 min), and incubated with secondary antibodies in 10% normal swine serum in  
498 blocking buffer overnight at room temperature. Finally, slides or coverslips were washed  
499 (3x10 min) in PBS (in the dark) and embedded in Vectashield containing DAPI (slides) or  
500 immediately used for imaging 3D-SIM and dSTORM.

501

## 502 *Antibodies*

503 For primary antibodies, we used goat antibody anti-SYCP3 (R&D Systems), mouse  
504 monoclonal antibody anti-DMC1 (Abcam ab1837), and a previously generated rabbit  
505 polyclonal anti-RAD51 (38). For secondary antibodies, we used a donkey anti-rabbit IgG

506 Alexa 488/647, donkey anti-mouse IgG Alexa 488/647, and donkey anti-goat Alexa 555  
507 (Molecular Probes).

508

### 509 *Confocal imaging*

510 Immunostained spreads were imaged using a Zeiss Confocal Laser Scanning Microscope  
511 700. This microscope is equipped with four lasers with wavelengths of 405 nm, 488 nm,  
512 555 nm and 639 nm. All images were made using a 63x objective immersed in oil with a  
513 numerical aperture of 1.40 and a pinhole set at 39  $\mu\text{m}$ . The digital offset was set to -2, and  
514 the laser power at 2%. The gain was adjusted for each image and channel. The images are  
515 all 1024x1024 in size, averaged 4 times.

516

### 517 *Nearest neighbour analysis*

518 The confocal images were analysed to determine the distribution of RAD51 and DMC1  
519 along the synaptonemal complexes by measuring the nearest neighbour distances. Single  
520 nuclei were manually segmented, next DMC1 and RAD51 foci were detected with the  
521 ImageJ function "Find Maxima", and a noise tolerance value of 90 (DMC1) and 100  
522 (RAD51). We then created a mask to outline the SYCP3 signals using manual thresholding,  
523 and these masks were then projected onto the image of all the maxima to remove all foci  
524 outside the selected area. These masks were also used for the projection of the pixels in  
525 the random simulations (see below). The coordinates of the remaining maxima were used  
526 to calculate the distances between all the maxima. With these distances the nearest  
527 neighbour of each maximum was determined, and the distance values were exported to  
528 Excel for further analysis. The nearest neighbour distance distributions of the observed  
529 DMC1 and RAD51 foci were compared to random distributions of foci on the SC axes,

530 using the Kolmogorov-Smirnov (KS) test. All KS test values were generated using the R  
531 function `ks.test`.

532

### 533 *Random simulation*

534 Simulated images were created by projecting the number of maxima of a nucleus onto a  
535 new image within the boundaries of the SYCP3 signal. This created an image with single  
536 pixel foci. To correct for the diffraction limited signal of a confocal microscope, the  
537 random image was blurred with a Gaussian filter with a sigma value of 0.11  $\mu\text{m}$ . This  
538 sigma value is approximately the standard deviation of the confocal microscope (FWHM  
539  $= 2\sqrt{2\ln 2} \sigma \approx 2.355 \sigma$  (Weisstein, 2002)). Simulated shot noise was added by adding a  
540 value of 5 to the entire image, and subsequently adding a random value between +/- the  
541 square root of the intensity of each individual pixel. This image was then processed in the  
542 same way as the confocal images. 50 random simulations were performed for each  
543 nucleus.

544

### 545 *3D-SIM and dSTORM imaging*

546 Coverslips immunostained as described above were mounted in an Attofluor Cell  
547 Chamber (Life Technologies). For drift correction and channel alignment 100nm Gold  
548 nanoparticles (Sigma) were added to the sample. To perform dSTORM imaging, an  
549 imaging buffer was prepared containing 40mM MEA (Sigma), 0.5mg/ml Glucose Oxidase  
550 (Sigma), 40  $\mu\text{g/ml}$  Catalase (Sigma) and 10% w/v Glucose in PBS pH 7.4. Samples were  
551 incubated in the imaging buffer during the entire imaging session.

552 Imaging was performed using a Zeiss Elyra PS1 system. Both 3D-SIM and dSTORM data  
553 were acquired using a 100x 1.49NA objective. 488, 561, 642 100mW diode lasers were  
554 used to excite the fluorophores together with respectively a BP 495-575 + LP 750, BP 570-

555 650 + LP 750 or LP 655 excitation filter. For 3D-SIM imaging a grating was present in the  
556 light path. The grating was modulated in 5 phases and 5 rotations, and multiple z-slices  
557 were recorded on an Andor iXon DU 885, 1002x1004 pixel EMCCD camera. dSTORM  
558 imaging was done using near-TIRF settings while the images were recorded on Andor  
559 iXon DU 897, 512x512 pixel EMCCD camera. At least 10 000 images were acquired at an  
560 interval of 33ms for Alexa 647. For Alexa 488 an interval of 50ms was used to compensate  
561 for the lower photon yield of the Alexa 488 dye. We used Alexa 488 and Alexa 647 dyes  
562 coupled to secondary antibodies to detect respectively RAD51 and DMC1 or vice versa.  
563 Using either fluorophore combination, we consistently detected ~1.5 times more  
564 localisation events for RAD51 than DMC1. As expected, we observed more localisations  
565 for Alexa 647 compared to Alexa 488, due to the more suitable photochemical properties  
566 for dSTORM of the former (39). We chose the more efficient Alexa 647 dye to detect DMC1,  
567 that is either less abundant or less well recognized by the primary antibody compared to  
568 RAD51, and the Alexa 488 dye to detect RAD51.

569

### 570 *3D-SIM and dSTORM image analysis*

571 3D- SIM images were analysed using the algorithm in the ZEN2011 (Carl Zeiss, Jena)  
572 software. For dSTORM, individual fluorescent events were localised in the subsequent  
573 frames using a 2D Gauss fitting algorithm in the ZEN2011 (Carl Zeiss, Jena) software.  
574 Detections in subsequent frames originating from the same fluorophore were grouped.  
575 Drift was corrected using 100nm gold nanoparticles (Sigma). The same fiducials were  
576 used to align the two colour dSTORM images using an affine alignment. Dual colour  
577 dSTORM and triple colour SIM images were aligned, based on the dSTORM and 3D-SIM  
578 Alexa 647 images, using a channel alignment algorithm in the ZEN2011 software. All  
579 observed foci were manually selected based on the SIM images, and circular regions



580 (radius of 300 nm) around the foci were selected using ImageJ within the Fiji platform  
581 (40). For each stage and each genotype, 2-5 nuclei were analysed. Each nucleus can be  
582 viewed as a biological replicate when differences between stages are considered, whereas  
583 each focus can be considered a biological replicate when the overall properties of the foci  
584 are analysed. The single molecule localisations of the individual foci were subsequently  
585 imported into R using the RStudio GUI for further analysis (Pau, Oles, Smith, Sklyar and  
586 Huber, EBImage: Image processing toolbox for R. v. 2.13 (2013)  
587 [http://watson.nci.nih.gov/bioc\\_mirror/packages/2.13/bioc/html/EBImage.html](http://watson.nci.nih.gov/bioc_mirror/packages/2.13/bioc/html/EBImage.html); R  
588 Development Core Team, R: A language and environment for statistical computing. R  
589 Foundation for Statistical Computing, R Foundation for Statistical Computing, Vienna,  
590 Austria, ISBN 3-900051-07-0, <http://www.R-project.org>.)  
591 Selected foci that were spatially overlapping were excluded if the percentage of  
592 overlapping localisations was larger than 25% (21). Also foci containing less than 50  
593 localisations were excluded from further analysis.

594

### 595 *Foci analysis*

596 Single molecule localisation data was used to fit a 2D Kernel Density Estimation (KDE)  
597 function (Wand, 2013, KernSmooth: Functions for kernel smoothing for Wand & Jones  
598 2.23-10, <http://CRAN.R-project.org/package=KernSmooth>). The KDE function estimates  
599 the density of localisations at a certain position in the image. The bandwidth of the density  
600 estimation was set to the approximate average localisation precision of our data: 20 nm.  
601 The 2D KDE gives a normalized density over the image. Because we are interested to  
602 determine the absolute density of localisations, the normalized density is multiplied by  
603 the number of localisations in the ROI. After fitting a 2D KDE to the data we are able to  
604 define objects by applying a threshold. The threshold was set at 5 localisation/pixel, equal

605 to 0.2 localisations/nm<sup>2</sup>. Very small clusters with an area covering less than 50 pixels  
606 were considered background. The resulting binary images were used to determine shape  
607 features (center of mass i.e.) (Pau, Oles, Smith, Sklyar and Huber, EBImage: Image  
608 processing toolbox for R. v. 2.13 (2013)  
609 [http://watson.nci.nih.gov/bioc\\_mirror/packages/2.13/bioc/html/EBImage.html](http://watson.nci.nih.gov/bioc_mirror/packages/2.13/bioc/html/EBImage.html)).

610 Pairwise comparison between the mean values of image features from individual meiotic  
611 stages was performed using an independent two sample Student t-test. A p-value below  
612 0.05 was considered a significant difference between the two samples. For alignment by  
613 rotation the center of mass was used to center images on the close DMC1 cluster for  
614 alignment by rotation. The subsequent localisations were all rotated so that either the far  
615 DMC1 or RAD51 center aligned above the (close DMC1) center. All localisations from  
616 indicated stages were pooled and rendered as an image using SMoLR (21).

617

### 618 *Simulation*

619 We generated a 3D model of a D2R1 focus consisting of three distinct Gaussian  
620 distributions of 3D coordinates. The two DMC1 clusters are represented as globular  
621 distributions where the standard deviation ( $\sigma$ ) of the Gaussian distribution is equal in x,y  
622 and z. RAD51 is represented as an ellipsoid distribution in which the  $\sigma$  of the Gaussian  
623 distribution is larger in one dimension. We used the mean number of localisations  
624 measured per cluster: 267, 564 and 51 coordinates for RAD51, close DMC1 and far DMC1  
625 respectively. We included 50 randomly distributed background coordinates in the model.  
626 The model was organized in such a way that the 'close' DMC1 cluster and the RAD51  
627 cluster are physically connected. The far DMC1 cluster was placed randomly at distance  
628 of 400 nm from the close DMC1 and the RAD51 cluster localises at a random angle relative  
629 to the DMC1-DMC1 axis in a three-dimensional space. We then varied the length of the

630 main axis of the RAD51 cluster ( $\sigma$ ) and the maximal angle ( $\alpha$ ) at which the ‘close’ DMC1-  
631 RAD51 cluster combination could be positioned relative to the DMC1-DMC1 axis, and  
632 generated datasets of 200 configurations for every combination of  $\sigma$  and  $\alpha$ . We fitted the  
633 experimental data to the simulations using 3 parameters: the  $\sigma$  of a Gaussian fitted over  
634 the RAD51 signal ( $\sigma$ -RAD51), the percentage of DMC1 signal in the top half of the center  
635 ( $\alpha$ -DMC1) in the rotation where RAD51 is aligned to the top, and the percentage of RAD51  
636 in the top quadrant ( $\alpha$ -RAD51) in the rotations where the far DMC1 is aligned to the top.  
637 These 3 parameters were measured in both the simulated data and the experimental  
638 data (Fig 7B). Using a least mean squares method the simulation which fits the  
639 experimental data best was determined.

#### 640 ACKNOWLEDGEMENTS

641 We would like to thank Prof. Dr. J. Anton Grootegoed (Erasmus MC, Rotterdam) for his  
642 valuable comments and suggestions to the initial manuscript draft and Sabrah Niesten  
643 (Erasmus MC, Rotterdam) for her contribution to the code components of the nearest  
644 neighbour analyses.

645

#### 646 AUTHOR CONTRIBUTIONS

647 Conceptualization, FC, MWP, JAS, ABH, and WMB; Methodology, FC, MWP, JAS, WavC,  
648 MdG, TV, and ABH; Software, MWP, JAS, and MdG; Formal Analyses, MWP, TV, and JAS;  
649 Investigation, FC, MWP, TV, and JAS; Writing-Original Draft, FC, MWP, and WMB; Writing-  
650 Review & Editing, all authors; Visualisation, FC, MWP, JAS, and WMB; Supervision, ABH,  
651 and WMB; Funding Acquisition, ABH and WMB

652

#### 653 FINANCIAL DISCLOSURE STATEMENT:

654 FC was funded by the Netherlands Organization for Scientific Research (NWO) through  
655 the ALW Open Programme 819.02.020. MP was funded by NWO-CW ECHO 104126.  
656 The funders had no role in study design, data collection and analysis, decision to publish,  
657 or preparation of the manuscript.

658

659 **COMPETING INTERESTS:**

660 The authors have no competing interests

661

662

663

664 REFERENCES

- 665 1. Baudat F, Manova K, Yuen JP, Jasin M, Keeney S. Chromosome synapsis defects and  
666 sexually dimorphic meiotic progression in mice lacking spo11. *Molecular cell*.  
667 2000;6(5):989-98.
- 668 2. Romanienko PJ, Camerini-Otero RD. The mouse spo11 gene is required for meiotic  
669 chromosome synapsis. *Molecular cell*. 2000;6(5):975-87.
- 670 3. Robert T, Nore A, Brun C, Maffre C, Crimi B, Bourbon HM, et al. The TopoVIB-Like  
671 protein family is required for meiotic DNA double-strand break formation. *Science*.  
672 2016;351(6276):943-9.
- 673 4. Hunter N. *Meiotic Recombination: The Essence of Heredity*. Cold Spring Harbor  
674 perspectives in biology. 2015;7(12).
- 675 5. Wright WD, Shah SS, Heyer WD. Homologous recombination and the repair of DNA  
676 double-strand breaks. *The Journal of biological chemistry*. 2018;293(27):10524-35.
- 677 6. Inagaki A, Schoenmakers S, Baarends WM. DNA double strand break repair,  
678 chromosome synapsis and transcriptional silencing in meiosis. *Epigenetics*.  
679 2010;5(4):255-66.
- 680 7. Ribeiro J, Abby E, Livera G, Martini E. RPA homologs and ssDNA processing during  
681 meiotic recombination. *Chromosoma*. 2016;125(2):265-76.
- 682 8. Moens PB, Kolas NK, Tarsounas M, Marcon E, Cohen PE, Spyropoulos B. The time  
683 course and chromosomal localization of recombination-related proteins at meiosis in the  
684 mouse are compatible with models that can resolve the early DNA-DNA interactions  
685 without reciprocal recombination. *Journal of cell science*. 2002;115(Pt 8):1611-22.
- 686 9. Habu T, Taki T, West A, Nishimune Y, Morita T. The mouse and human homologs  
687 of DMC1, the yeast meiosis-specific homologous recombination gene, have a common

- 688 unique form of exon- skipped transcript in meiosis. *Nucleic acids research*.  
689 1996;24(3):470-7.
- 690 10. Moens PB, Chen DJ, Shen Z, Kolas N, Tarsounas M, Heng HHQ. Rad51  
691 immunocytology in rat and mouse spermatocytes and oocytes. *Chromosoma*.  
692 1997;106:207-15.
- 693 11. Tarsounas M, Morita T, Pearlman RE, Moens PB. RAD51 and DMC1 form mixed  
694 complexes associated with mouse meiotic chromosome cores and synaptonemal  
695 complexes. *The Journal of cell biology*. 1999;147(2):207-20.
- 696 12. Kurzbauer MT, Uanschou C, Chen D, Schlogelhofer P. The recombinases DMC1 and  
697 RAD51 are functionally and spatially separated during meiosis in Arabidopsis. *Plant Cell*.  
698 2012;24(5):2058-70.
- 699 13. Brown MS, Grubb J, Zhang A, Rust MJ, Bishop DK. Small Rad51 and Dmc1  
700 Complexes Often Co-occupy Both Ends of a Meiotic DNA Double Strand Break. *PLoS Genet*.  
701 2015;11(12):e1005653.
- 702 14. Fraune J, Schramm S, Alsheimer M, Benavente R. The mammalian synaptonemal  
703 complex: protein components, assembly and role in meiotic recombination. *Experimental*  
704 *cell research*. 2012;318(12):1340-6.
- 705 15. de Vries FA, de Boer E, van den Bosch M, Baarends WM, Ooms M, Yuan L, et al.  
706 Mouse Sycp1 functions in synaptonemal complex assembly, meiotic recombination, and  
707 XY body formation. *Genes & development*. 2005;19(11):1376-89.
- 708 16. Billings T, Sargent EE, Szatkiewicz JP, Leahy N, Kwak IY, Bektassova N, et al.  
709 Patterns of recombination activity on mouse chromosome 11 revealed by high resolution  
710 mapping. *PloS one*. 2010;5(12):e15340.

- 711 17. de Boer E, Dietrich AJ, Hoog C, Stam P, Heyting C. Meiotic interference among MLH1  
712 foci requires neither an intact axial element structure nor full synapsis. *Journal of cell*  
713 *science*. 2007;120(Pt 5):731-6.
- 714 18. de Boer E, Stam P, Dietrich AJ, Pastink A, Heyting C. Two levels of interference in  
715 mouse meiotic recombination. *Proceedings of the National Academy of Sciences of the*  
716 *United States of America*. 2006;103(25):9607-12.
- 717 19. Cole F, Kauppi L, Lange J, Roig I, Wang R, Keeney S, et al. Homeostatic control of  
718 recombination is implemented progressively in mouse meiosis. *Nature cell biology*.  
719 2012;14(4):424-30.
- 720 20. Carofiglio F, Inagaki A, de Vries S, Wassenaar E, Schoenmakers S, Vermeulen C, et  
721 al. SPO11-Independent DNA Repair Foci and Their Role in Meiotic Silencing. *PLoS Genet*.  
722 2013;9(6):e1003538.
- 723 21. Paul MW, de Gruiter HM, Lin Z, Baarends WM, van Cappellen WA, Houtsmuller AB,  
724 et al. SMoLR: visualization and analysis of single-molecule localization microscopy data in  
725 R. *BMC Bioinformatics*. 2019;20(1):30.
- 726 22. Boateng KA, Bellani MA, Gregoretti IV, Pratto F, Camerini-Otero RD. Homologous  
727 pairing preceding SPO11-mediated double-strand breaks in mice. *Developmental cell*.  
728 2013;24(2):196-205.
- 729 23. Hamer G, Gell K, Kouznetsova A, Novak I, Benavente R, Hoog C. Characterization of  
730 a novel meiosis-specific protein within the central element of the synaptonemal complex.  
731 *Journal of cell science*. 2006;119(Pt 19):4025-32.
- 732 24. Hamer G, Wang H, Bolcun-Filas E, Cooke HJ, Benavente R, Hoog C. Progression of  
733 meiotic recombination requires structural maturation of the central element of the  
734 synaptonemal complex. *Journal of cell science*. 2008;121(Pt 15):2445-51.

- 735 25. Schramm S, Fraune J, Naumann R, Hernandez-Hernandez A, Hoog C, Cooke HJ, et  
736 al. A novel mouse synaptonemal complex protein is essential for loading of central  
737 element proteins, recombination, and fertility. *PLoS Genet.* 2011;7(5):e1002088.
- 738 26. Sanchez H, Paul MW, Grosbart M, van Rossum-Fikkert SE, Lebbink JH, Kanaar R, et  
739 al. Architectural plasticity of human BRCA2-RAD51 complexes in DNA break repair.  
740 *Nucleic acids research.* 2017;45(8):4507-18.
- 741 27. Haas KT, Lee M, Esposito A, Venkitaraman AR. Single-molecule localization  
742 microscopy reveals molecular transactions during RAD51 filament assembly at cellular  
743 DNA damage sites. *Nucleic acids research.* 2018;46(5):2398-416.
- 744 28. Mikhaylova M, Cloin BM, Finan K, van den Berg R, Teeuw J, Kijanka MM, et al.  
745 Resolving bundled microtubules using anti-tubulin nanobodies. *Nature communications.*  
746 2015;6:7933.
- 747 29. Pleiner T, Bates M, Gorlich D. A toolbox of anti-mouse and anti-rabbit IgG  
748 secondary nanobodies. *The Journal of cell biology.* 2018;217(3):1143-54.
- 749 30. Ristic D, Modesti M, van der Heijden T, van Noort J, Dekker C, Kanaar R, et al.  
750 Human Rad51 filaments on double- and single-stranded DNA: correlating regular and  
751 irregular forms with recombination function. *Nucleic Acids Res.* 2005;33(10):3292-3302.
- 752 31. Lange J, Yamada S, Tischfield SE, Pan J, Kim S, Zhu X, et al. The Landscape of Mouse  
753 Meiotic Double-Strand Break Formation, Processing, and Repair. *Cell.* 2016;167(3):695-  
754 708 e16.
- 755 32. Hinch AG, Zhang G, Becker PW, Moralli D, Hinch R, Davies B, et al. Factors  
756 influencing meiotic recombination revealed by whole-genome sequencing of single  
757 sperm. *Science.* 2019;363(6433).



- 758 33. Howard-Till RA, Lukaszewicz A, Loidl J. The recombinases Rad51 and Dmc1 play  
759 distinct roles in DNA break repair and recombination partner choice in the meiosis of  
760 Tetrahymena. *PLoS Genet.* 2011;7(3):e1001359.
- 761 34. Faieta M, Di Cecca S, de Rooij DG, Luchetti A, Murdocca M, Di Giacomo M, et al. A  
762 surge of late-occurring meiotic double-strand breaks rescues synapsis abnormalities in  
763 spermatocytes of mice with hypomorphic expression of SPO11. *Chromosoma.* 2015.
- 764 35. Gray S, Allison RM, Garcia V, Goldman AS, Neale MJ. Positive regulation of meiotic  
765 DNA double-strand break formation by activation of the DNA damage checkpoint kinase  
766 Mec1(ATR). *Open biology.* 2013;3(7):130019.
- 767 36. Kauppi L, Barchi M, Lange J, Baudat F, Jasin M, Keeney S. Numerical constraints and  
768 feedback control of double-strand breaks in mouse meiosis. *Genes & development.*  
769 2013;27(8):873-86.
- 770 37. Peters AH, Plug AW, van Vugt MJ, de Boer P. A drying-down technique for the  
771 spreading of mammalian meiocytes from the male and female germline. *Chromosome*  
772 *research : an international journal on the molecular, supramolecular and evolutionary*  
773 *aspects of chromosome biology.* 1997;5(1):66-8.
- 774 38. Essers J, Hendriks RW, Wesoly J, Beerens CE, Smit B, Hoeijmakers JH, et al. Analysis  
775 of mouse Rad54 expression and its implications for homologous recombination. *DNA*  
776 *repair.* 2002;1(10):779-93.
- 777 39. van de Linde S, Loschberger A, Klein T, Heidbreder M, Wolter S, Heilemann M, et  
778 al. Direct stochastic optical reconstruction microscopy with standard fluorescent probes.  
779 *Nat Protoc.* 2011;6(7):991-1009.
- 780 40. Schindelin J, Arganda-Carreras I, Frise E, Kaynig V, Longair M, Pietzsch T, et al. Fiji:  
781 an open-source platform for biological-image analysis. *Nature methods.* 2012;9(7):676-  
782 82.

783 **Figures**

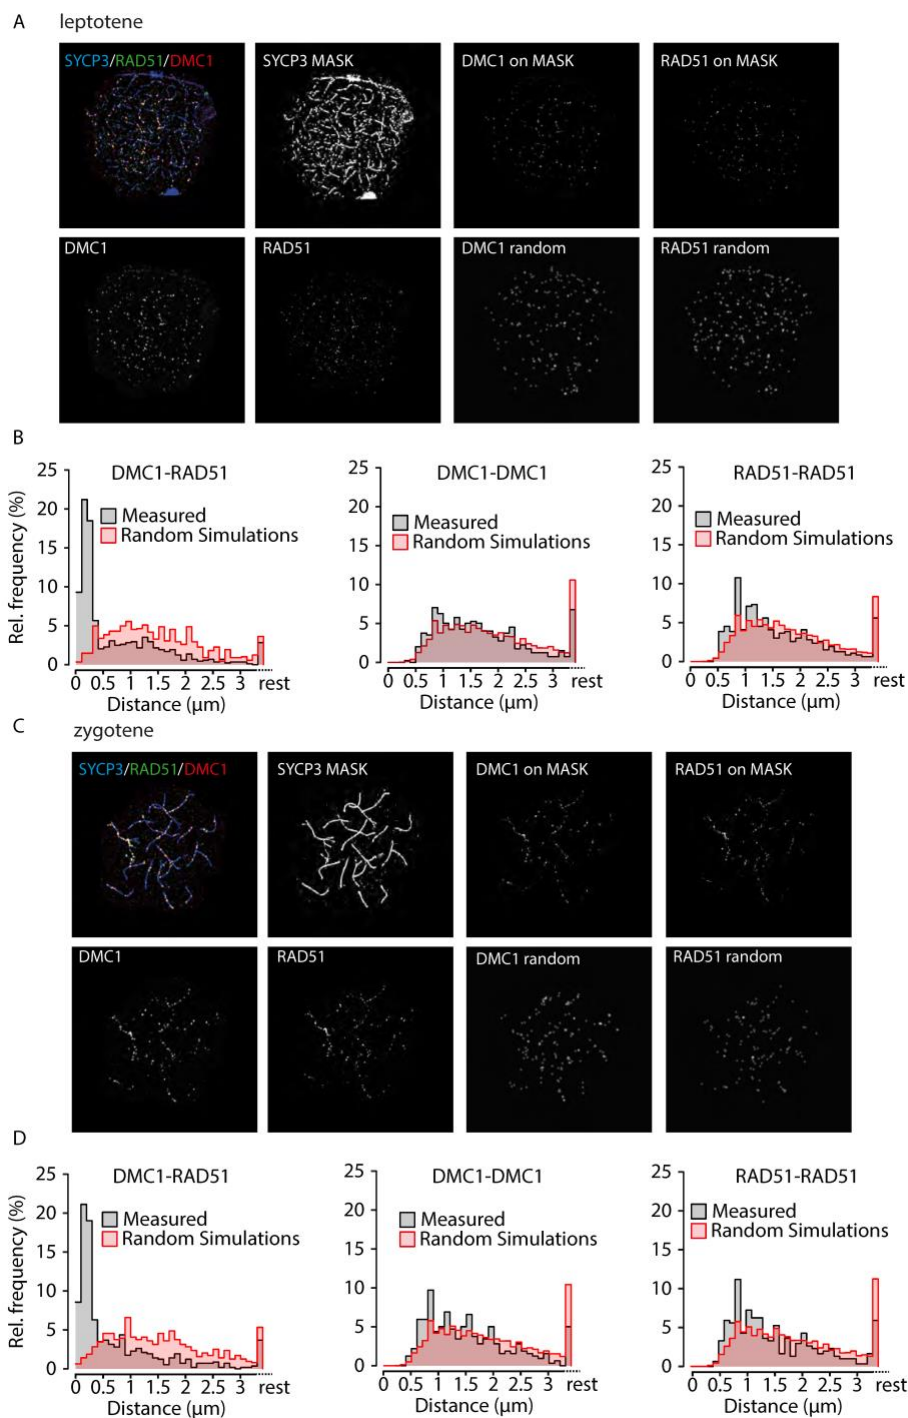

784 **Fig 1: Nearest neighbour analyses of confocal microscopy images of RAD51 and DMC1**

785 **foci on the synaptonemal complex axes**

786 *A), C) Top left, example confocal image of triple stained leptotene (A) and zygotene (C)*

787 *nucleus, with primary antibodies for RAD51, DMC1, and SYCP3, and appropriate secondary*

788 *antibodies conjugated with Alexa 488 (green), Alexa 647 (red), and Alexa 555 (blue),*

789 *respectively; single DMC1 and RAD51 images are shown in greyscale below; the SYCP3 mask*  
790 *generated as described in Materials and methods is shown to the right of the triple staining;*  
791 *the two top right images show the DMC1 and RAD51 foci that localize on the mask, and*  
792 *below them, the same number of foci randomly distributed on the mask. B), D) Relative*  
793 *frequency distribution of nearest neighbour distances between DMC1 and RAD51 (left)*  
794 *DMC1 and DMC1 (middle) and RAD51 and RAD51 (right) in leptotene (B, n=7 nuclei; 606*  
795 *DMC1 foci, 712 RAD51 foci) and zygotene (D, n=6 nuclei; 471 DMC1 foci, 462 RAD51 foci)*  
796 *wild type nuclei. Distances were binned in 100nm bins, distances larger than 3.4  $\mu\text{m}$  were*  
797 *labelled as rest. Grey bars, experimental data; red bars, simulated data (see Materials and*  
798 *Methods)*  
799

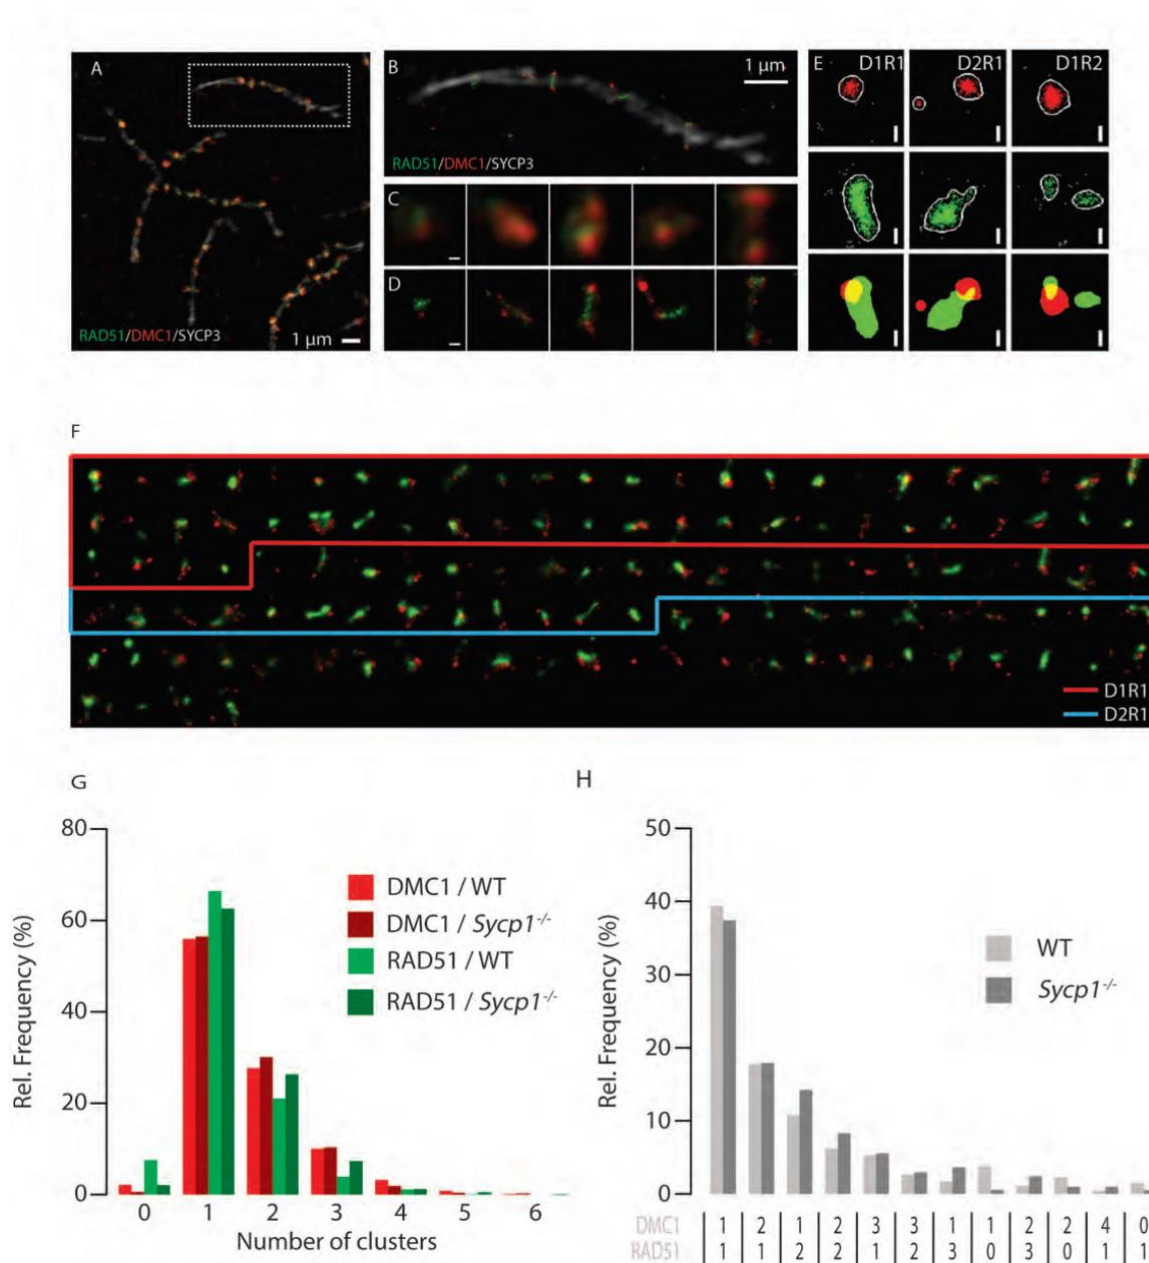

800

801 **Fig 2: Meiotic DSB foci in super-resolution**

802 A) Cropped region from a SIM image of a spread mouse late zygotene nucleus

803 immunostained with primary antibodies for RAD51, DMC1, and SYCP3, and appropriate

804 secondary antibodies conjugated with Alexa 488 (green), Alexa 647 (red), and Alexa 555

805 (white), respectively. B) SYCP3 SIM overlaid with RAD51/DMC1 dSTORM images of boxed

806 region in A). C) Close-up of single DSB foci present on the synaptonemal complex shown in

807 A). D) The same foci visualized with dSTORM. E) Single DSB foci of three types (left panels

808 D1R1, middle panels D2R1, right panels D1R2) represented by 2 different

809 *visualisation/analysis methods: scatter plot of localisations and merged binary*  
810 *representation of the kernel density estimation. F) Compilation of all ROIs of a single late*  
811 *zygotene nucleus (indicated with an asterisk in Supplemental Figure S2). ROIs are sorted by*  
812 *their DxRy configuration, from most frequent to rare configuration. The boxes indicated the*  
813 *ROIs belonging to the D1R1 (red) and D2R1 (blue) configurations. G) Relative frequency of*  
814 *foci containing indicated number of RAD51 or DMC1 clusters per focus as a percentage of*  
815 *the number of foci per genotype. H) Relative frequency of foci containing the indicated*  
816 *combinations of RAD51 and DMC1 clusters per focus as a percentage of the number of foci*  
817 *per genotype. Combinations that represented less than 1% of the foci in both wild type and*  
818 *Sycp1<sup>-/-</sup> were grouped in the category referred to as rest. Scale bars 100nm.*  
819

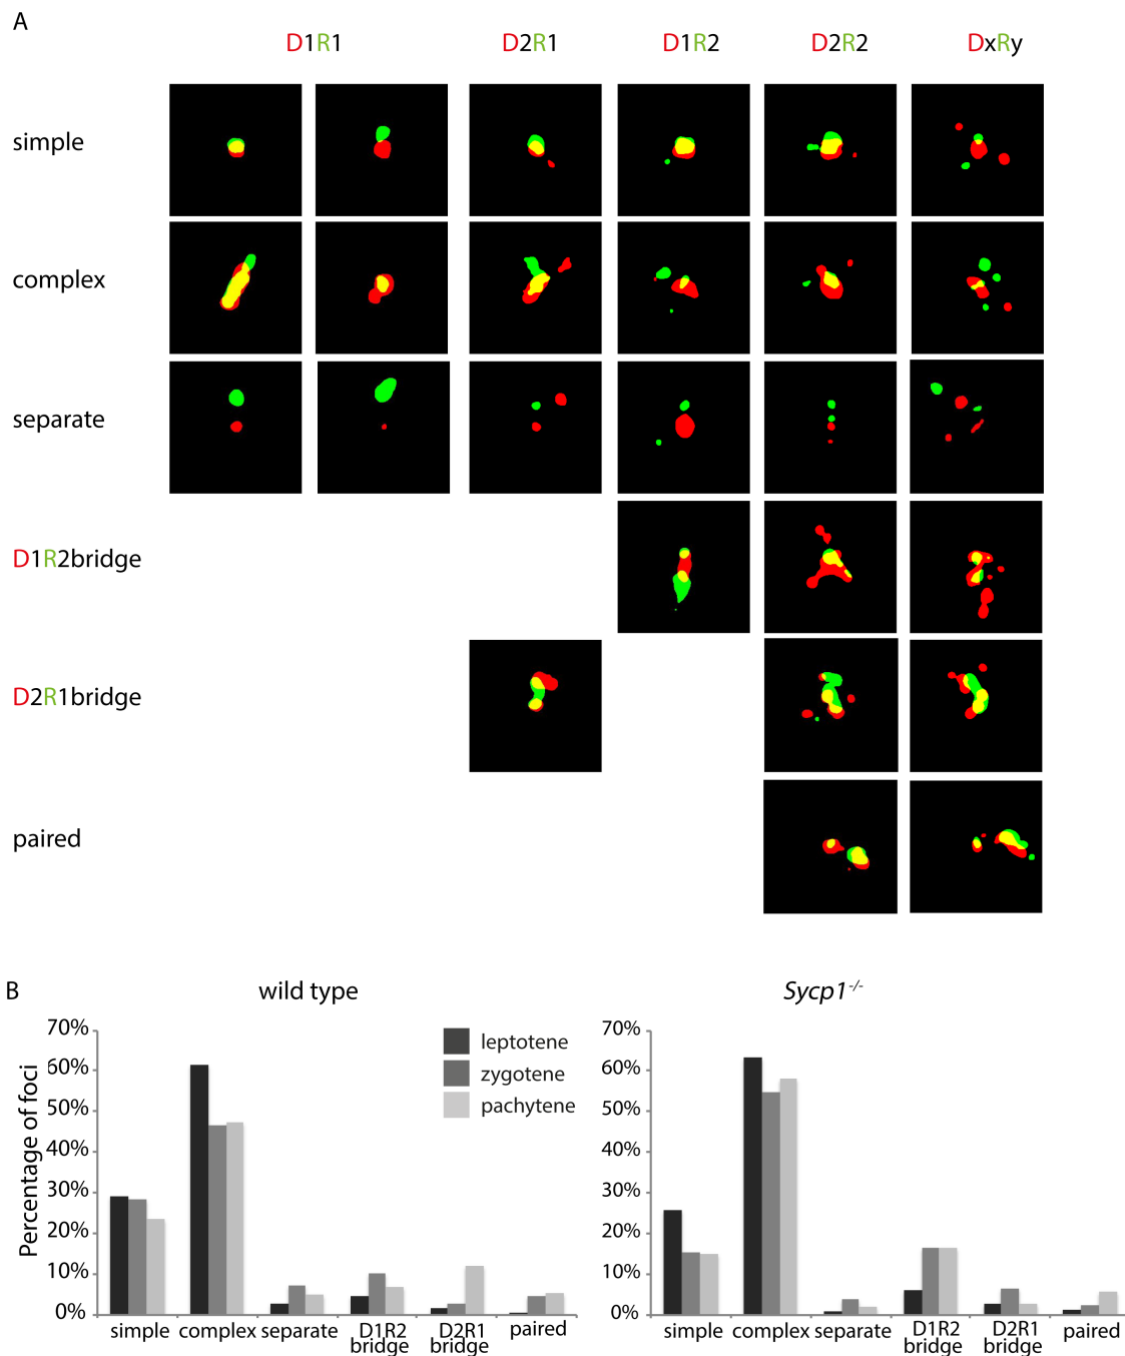

820

821 **Figure 3: Morphological classification of RAD51-DMC1 configurations**

822 A). All foci were classified as simple, complex, separate, D1R2 bridge, D2R1 bridge, or paired  
 823 as described in the main text. Examples of each are shown for (from left to right), D1R1  
 824 D1R2, D2R1, D2R2, DxRy. B) Relative frequency distributions of the morphological  
 825 classifications in leptotene (dark grey), zygotene (gray) and pachytene (light gray) of wild  
 826 type (left) and *Sycp1*<sup>-/-</sup> nuclei.

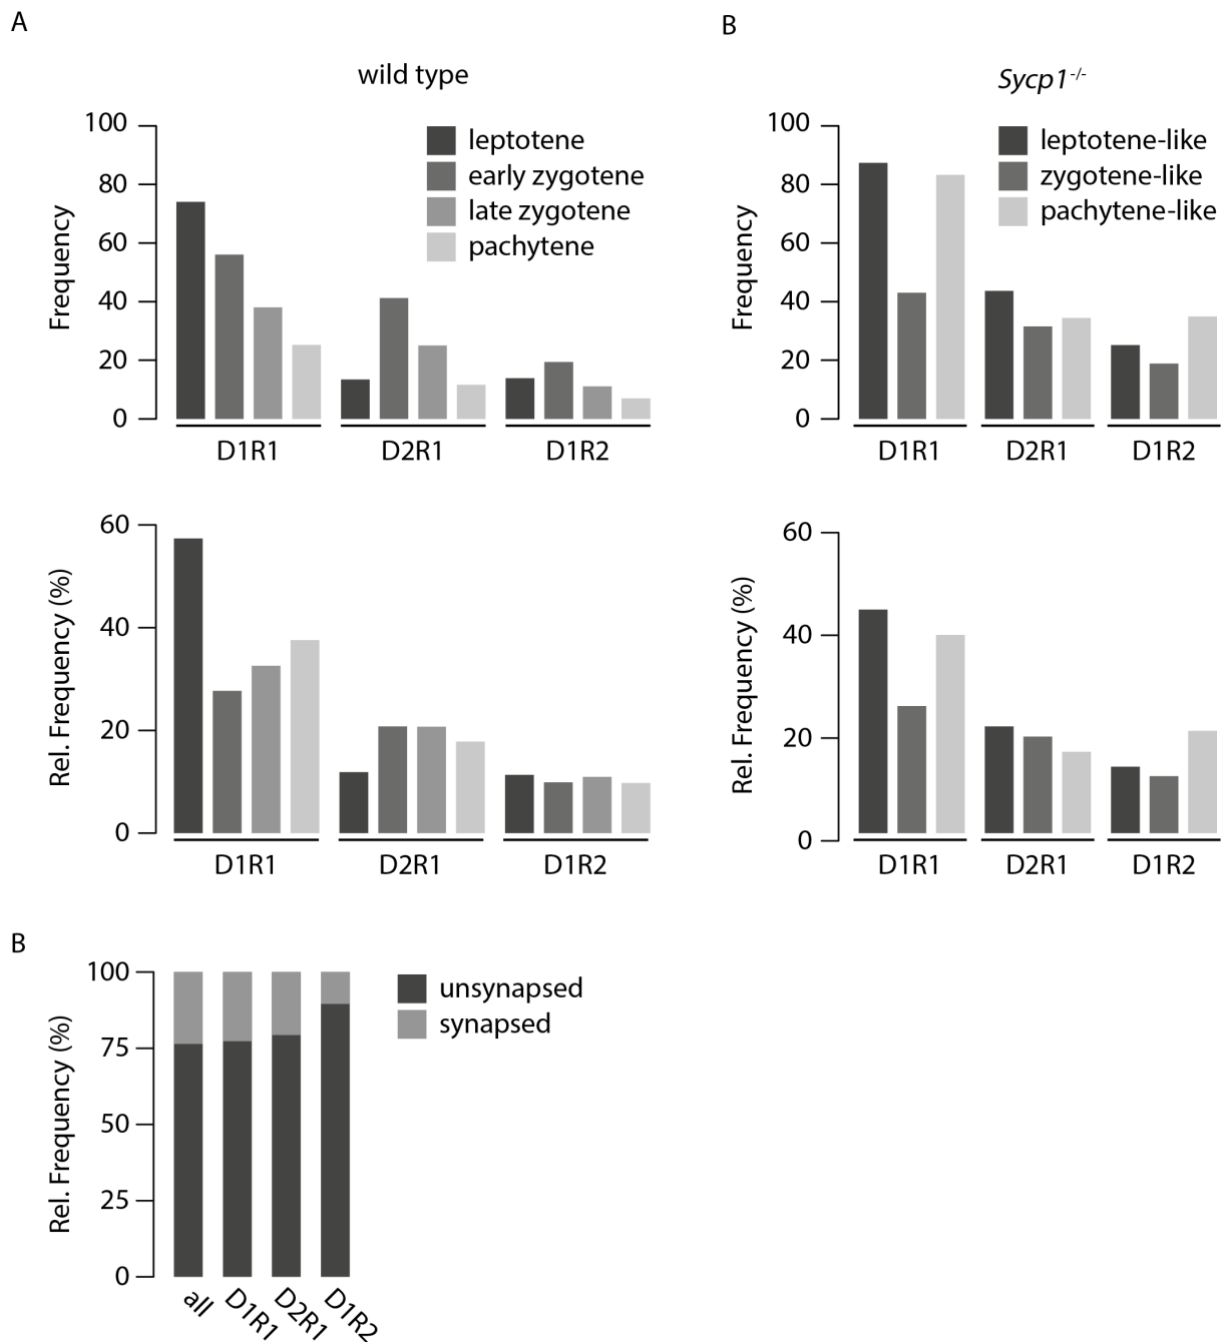

827

828 **Fig 4: Dynamics of D1R1, D2R1, and D1R2 foci numbers during progression of meiotic**  
 829 **prophase in wild type and Sycp1<sup>-/-</sup> spermatocytes**

830 *A) Average frequency (top) and relative frequency (bottom) of D1R1, D2R1, and D1R2 foci*  
 831 *per cell per stage for wild type spermatocytes. B) as in A) but for Sycp1<sup>-/-</sup> spermatocytes. C)*  
 832 *Relative frequency (right) of all, D1R1, D2R1 and D1R2 foci on synapsed or unsynapsed*  
 833 *synaptonemal complexes at the zygotene stage.*

834

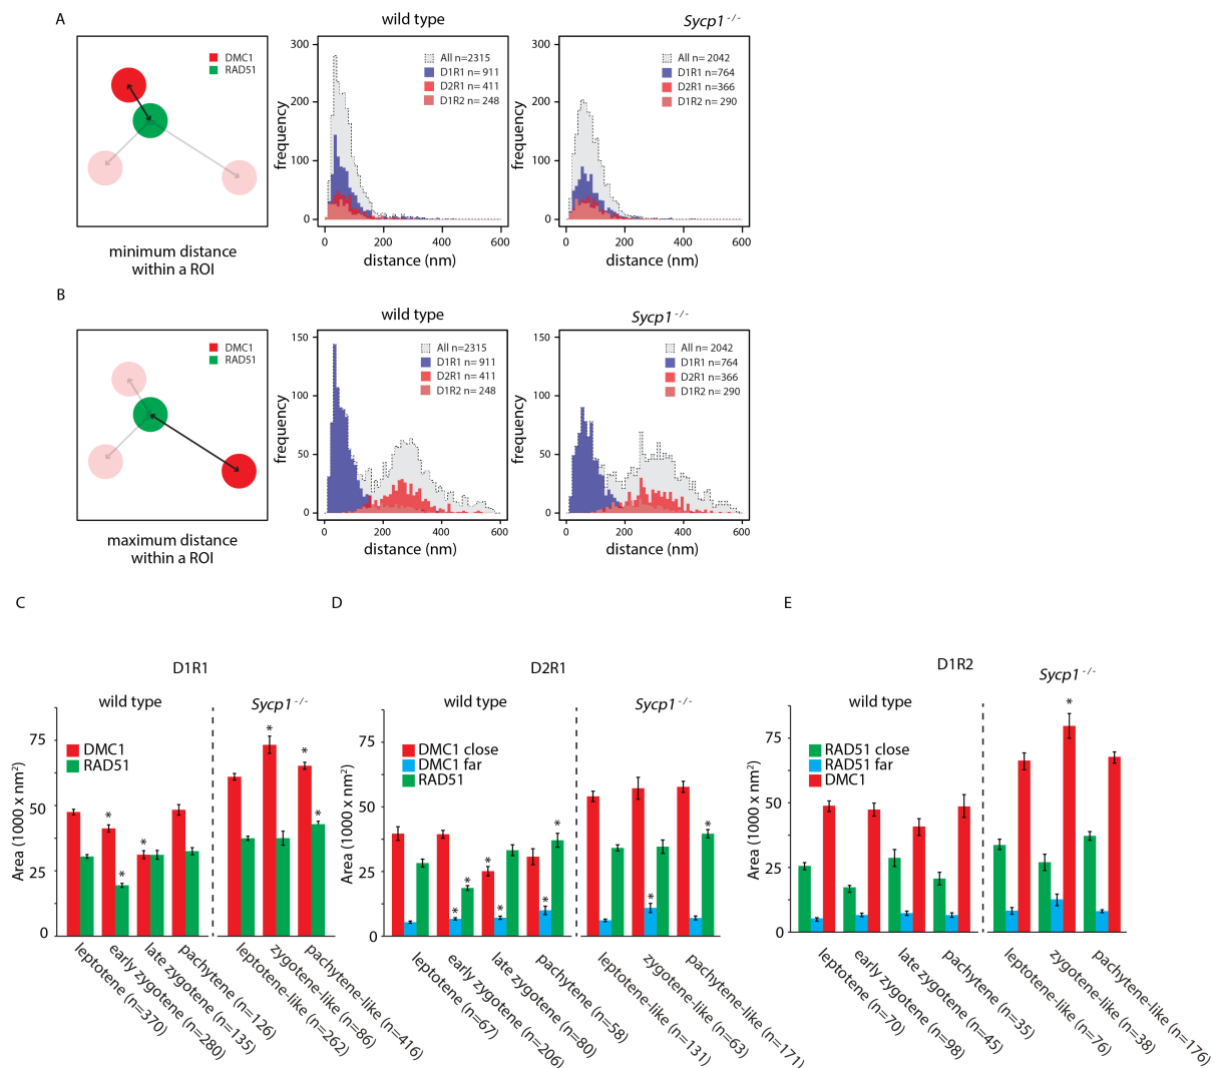

835

836 **Fig 5: Distances between DMC1 and RAD51 clusters, and area occupancy**

837 A) Distribution of the minimum distances between the center of mass of RAD51 and DMC1  
 838 clusters in wild type (middle panel) and *Sycp1*<sup>-/-</sup> (right panel) foci. Dashed lines with grey fill  
 839 represent all foci, the D1R1, D1R2 and D2R1 subgroups are depicted in blue, light red, and  
 840 red histograms, respectively. B) As in A) but maximum distances are depicted. C) Area of  
 841 RAD51 and DMC1 clusters in D1R1 subgroup. Error bars indicate SEM, asterisks indicate  
 842 significant difference compared to leptotene ( $p < 0.05$ ). n indicated number of foci. D) As in  
 843 C) but area of RAD51 and DMC1 close and far clusters in D2R1 subgroup are shown. E) As in  
 844 D) but area of RAD51 and DMC1 close and far clusters in D1R2 subgroup are shown. p-values  
 845 can be found in Supplemental Table S2.



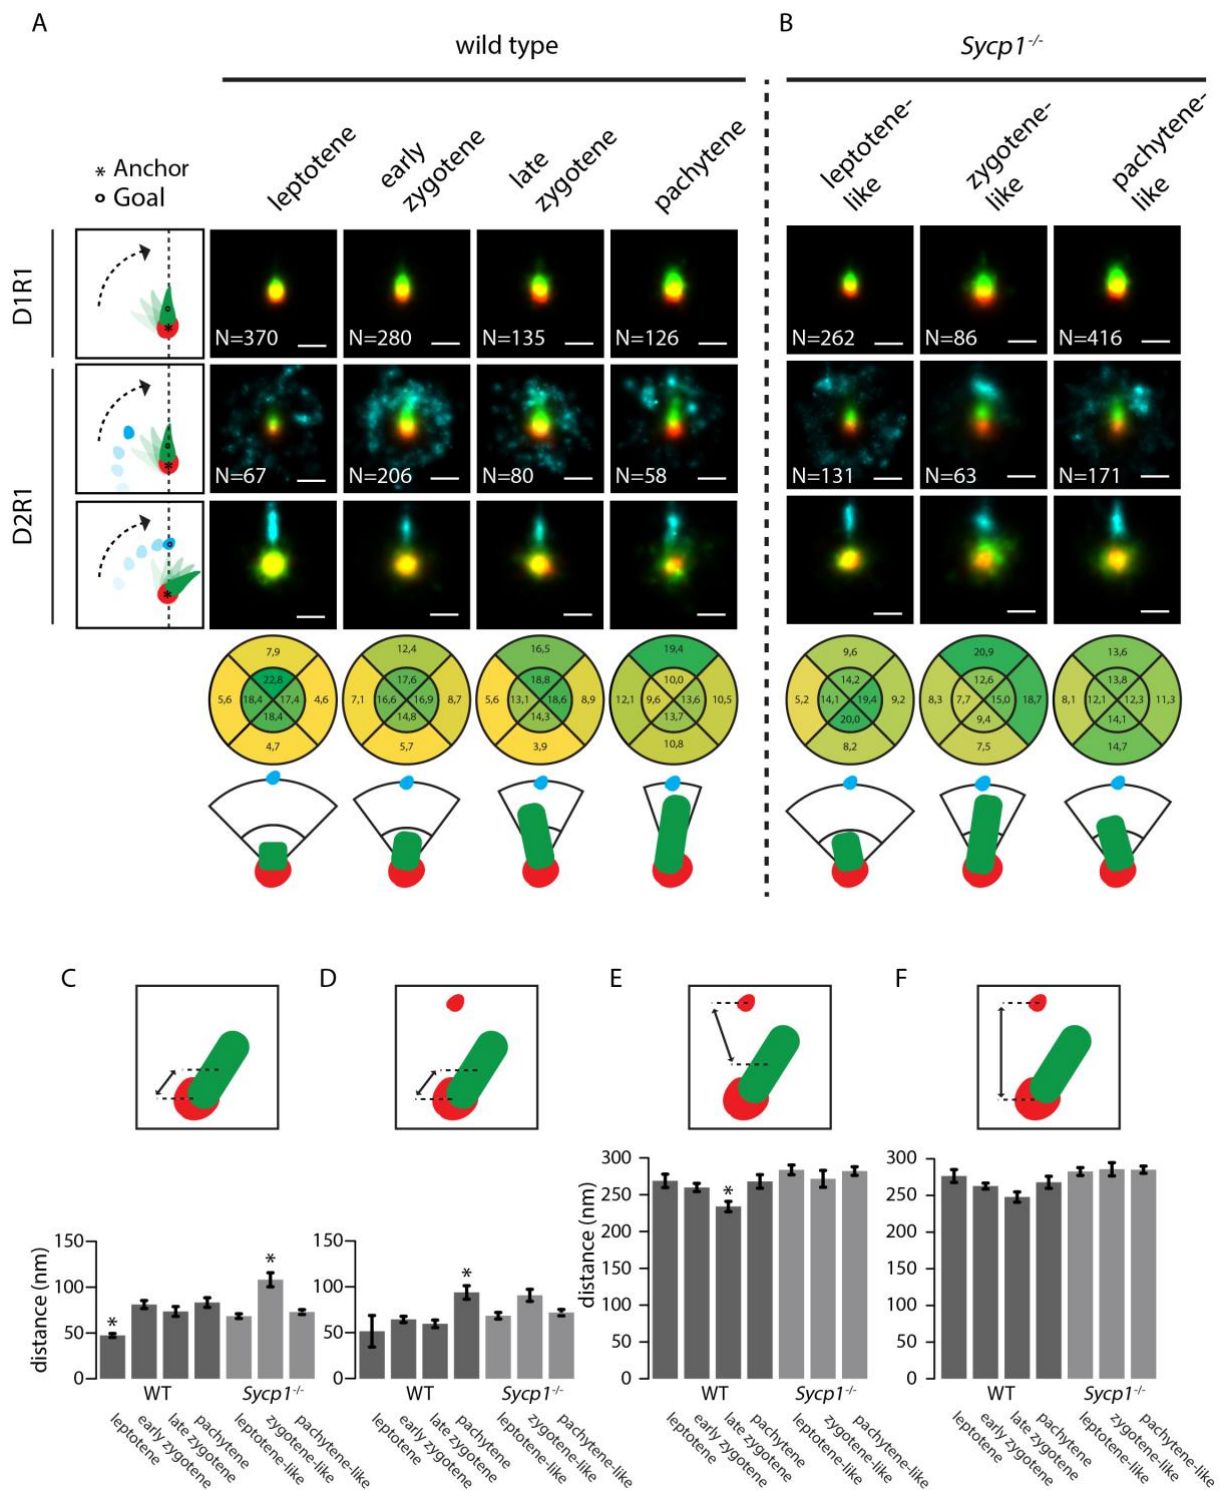

852 *(o) the cluster that is rotated to align along the axis. Underneath the lowest D2R1 row, the*  
853 *percentage of localisations for the RAD51 cluster in each indicated quadrant area is shown*  
854 *for each stage for the rotation whereby the close-DMC1 is used as anchor and the far-DMC1*  
855 *as goal. A schematic interpretation of the results of the rotations is also shown. (C-F) Mean*  
856 *distances between the indicated clusters per stage in wild type and Sycp1<sup>-/-</sup> spermatocytes.*  
857 *Error bars indicate SEM. Asterisks indicate significant difference compared to all other*  
858 *stages ( $p < 0.05$ ). Scale bars represent 100nm.  $p$ -values can be found in Supplemental Table*  
859 *S2.*

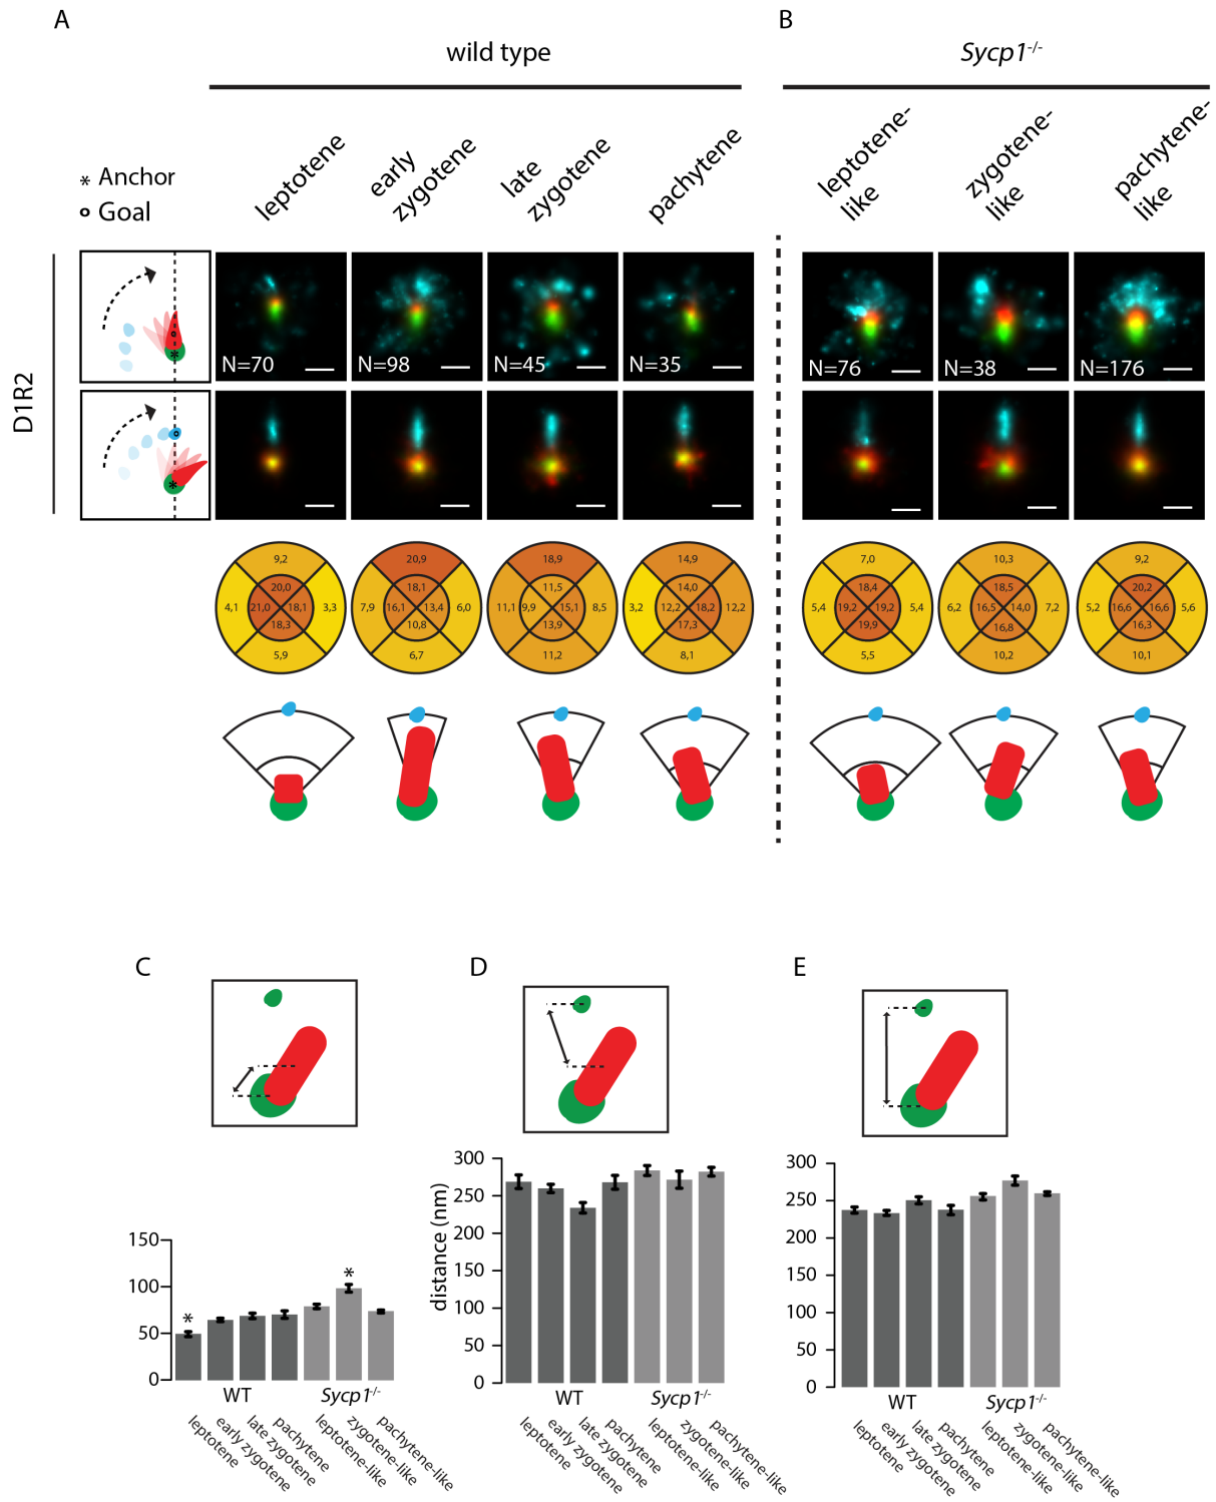

860

861 **Figure 7: Consensus patterns of D1R2 during meiotic prophase in wild type and *Sycp1***

862 ***-/-* spermatocytes**

863 *Summed images of all rotated and aligned foci within the D1R2 group in wild type (A) and*

864 **Sycp1*<sup>-/-</sup> (B) per stage. Images were rotated as indicated by schematic drawings to the left of*

865 *each row, whereby the anchor (\*) indicates the cluster that is centred, and the goal (o) the*  
866 *cluster that is rotated to align along the axis. Underneath the lowest D1R2 row, the*  
867 *percentage of localizations for the DMC1 cluster in each indicated quadrant area is shown*  
868 *for each stage for the rotation whereby the close-RAD51 is used as anchor and the far-RAD51*  
869 *as goal. A schematic interpretation of the results of the rotations is also shown. (C-E) Mean*  
870 *distances between the indicated clusters per stage in wild type and Sycp1-/- spermatocytes.*  
871 *Error bars indicate SEM. Asterisks indicate significant difference compared to all other*  
872 *stages ( $p < 0.05$ ). Scale bars represent 100nm. p-values can be found in Supplemental Table*  
873 *S2.*

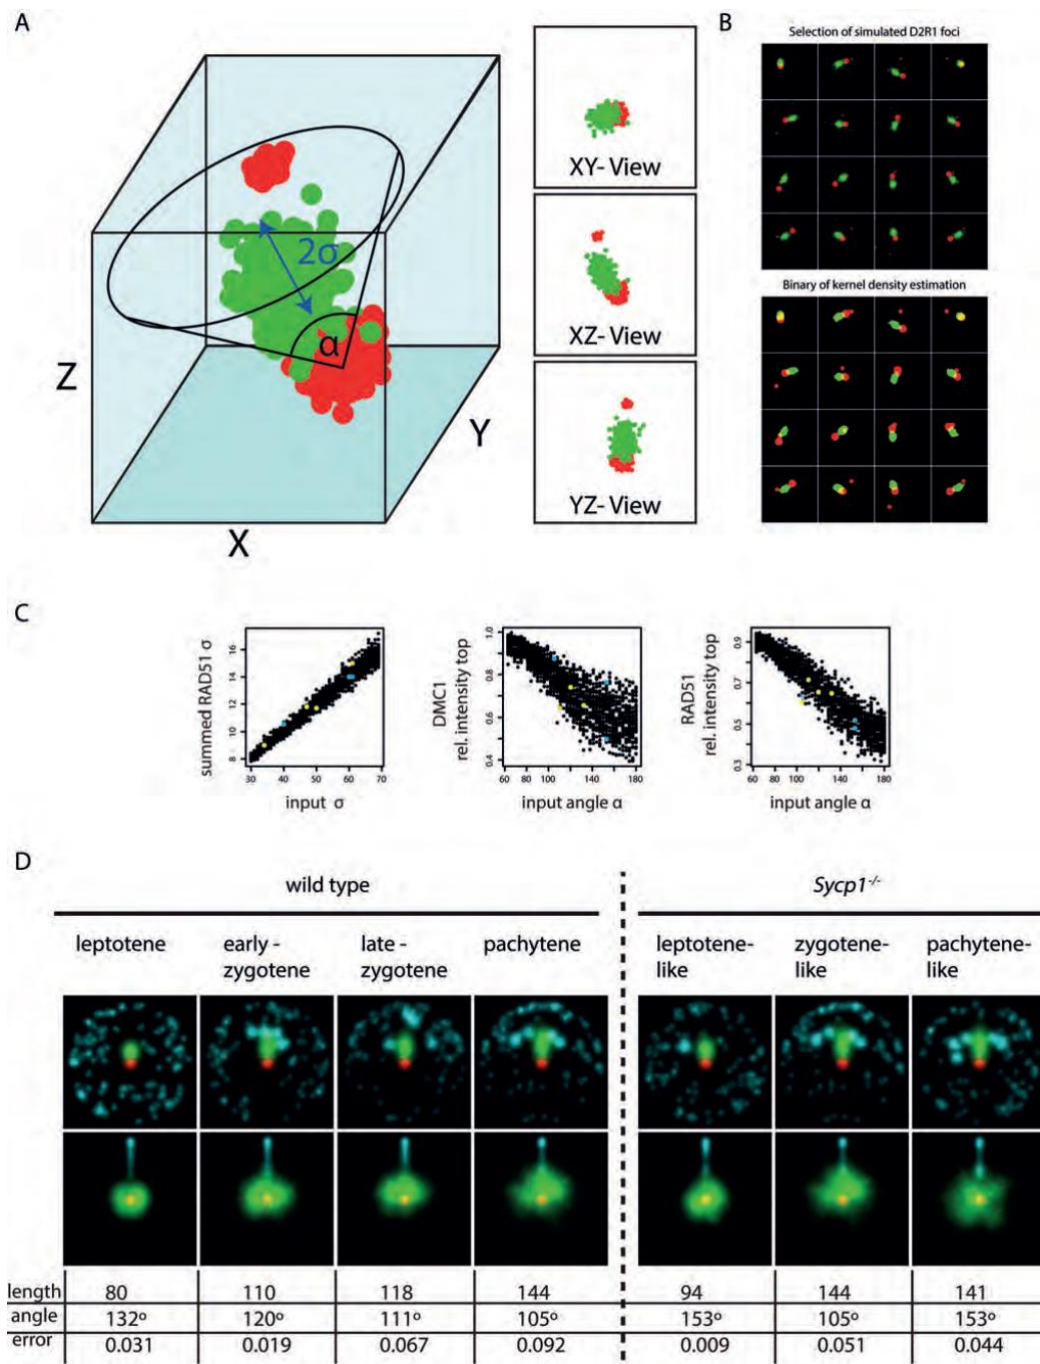

874

875 **Fig 8: Simulations of D2R1 rotations**

876 A) Model of D2R1 foci in three dimensions, where the alpha indicates the maximum angle  
 877 relative to the DMC1-DMC1 axis, the sigma the length of the major axis of the RAD51  
 878 cluster. B) Selection of simulated foci using one model randomly positioned in space and  
 879 visualised in two dimensions. C) Measured RAD51 length, RAD51 intensity in the top  
 880 quadrant and DMC1 intensity in the top half for all simulated foci, whereby each point

881 *represents an assembly from 200 aligned foci. Coloured points represent measured values*  
882 *from experimental data from both wild type (yellow) and Sycp1<sup>-/-</sup> (blue) nuclei at the stages*  
883 *analysed. E) Summed images of simulations that fit best to experimental data, length (full*  
884 *width half maximum:  $2.355\sigma$ ), angle and error are indicated.*  
885

886 SUPPORTING INFORMATION

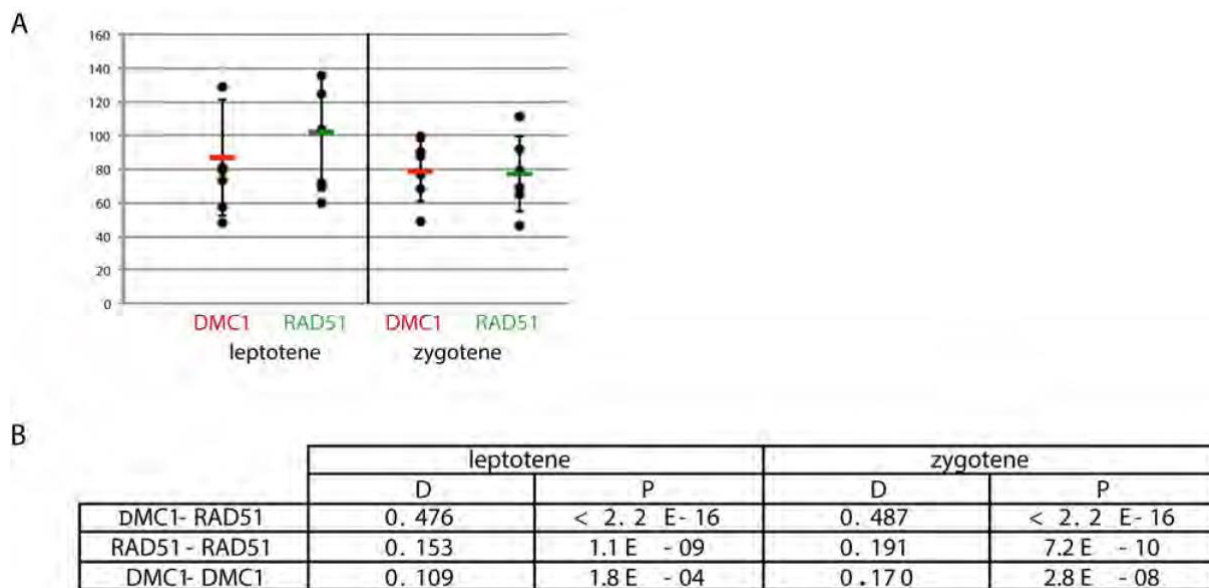

887

888 Supplemental Figure S1: Foci numbers in confocal images used for nearest neighbour  
889 distance measurement and statistical analyses

890 A) Foci numbers were determined automatically using FIJI as described in materials and  
891 methods. Numbers counted in each individual nucleus are shown. Horizontal bar depicts  
892 the average and error bars indicate standard deviation. B) Results from Kolmogorov-  
893 Smirnov test comparing nearest neighbour distance distributions between experimental  
894 data and simulations. Distance (D) values (largest vertical distance in cumulative  
895 frequency histogram of distances) and probability (p) values are shown for the indicated  
896 analyses.

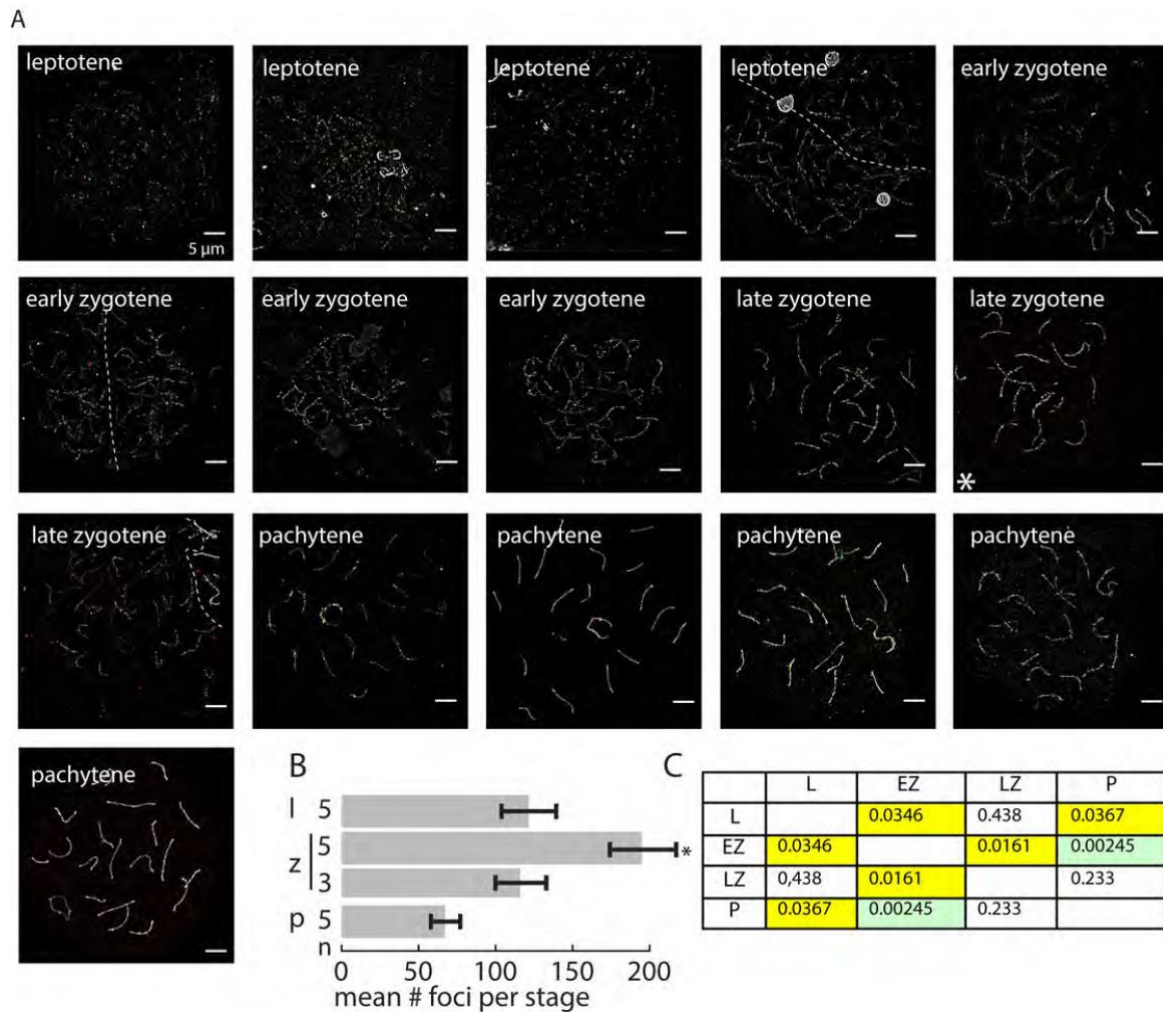

897

898 Supplemental Figure S2: Analysed wild type nuclei

899 (A) 3D-SIM images of the wild type nuclei analysed per stage. Nuclei were immunostained  
 900 for RAD51 (green), DMC1 (red), and SYCP3 (white). In cases where two nuclei were  
 901 imaged in the same field of view they are separated by a dashed line. Scale bars represent  
 902 5  $\mu$ m. Asterisk indicates late zygotene nucleus of which foci are shown in Figure 2F (B)  
 903 Bar graph showing the average number of foci from wild type spermatocyte nuclei that  
 904 were analysed in dSTORM per stage (leptotene, early/late zygotene, pachytene). The  
 905 number of analysed nuclei per stage is indicated to the left of each bar. Error bars indicate  
 906 SEM, asterisk indicate significant difference to all other stages ( $p < 0.05$ ). (C) p-values for  
 907 foci number comparisons between stages (yellow background;  $p < 0.05$ , green background  
 908  $p < 0.005$ )



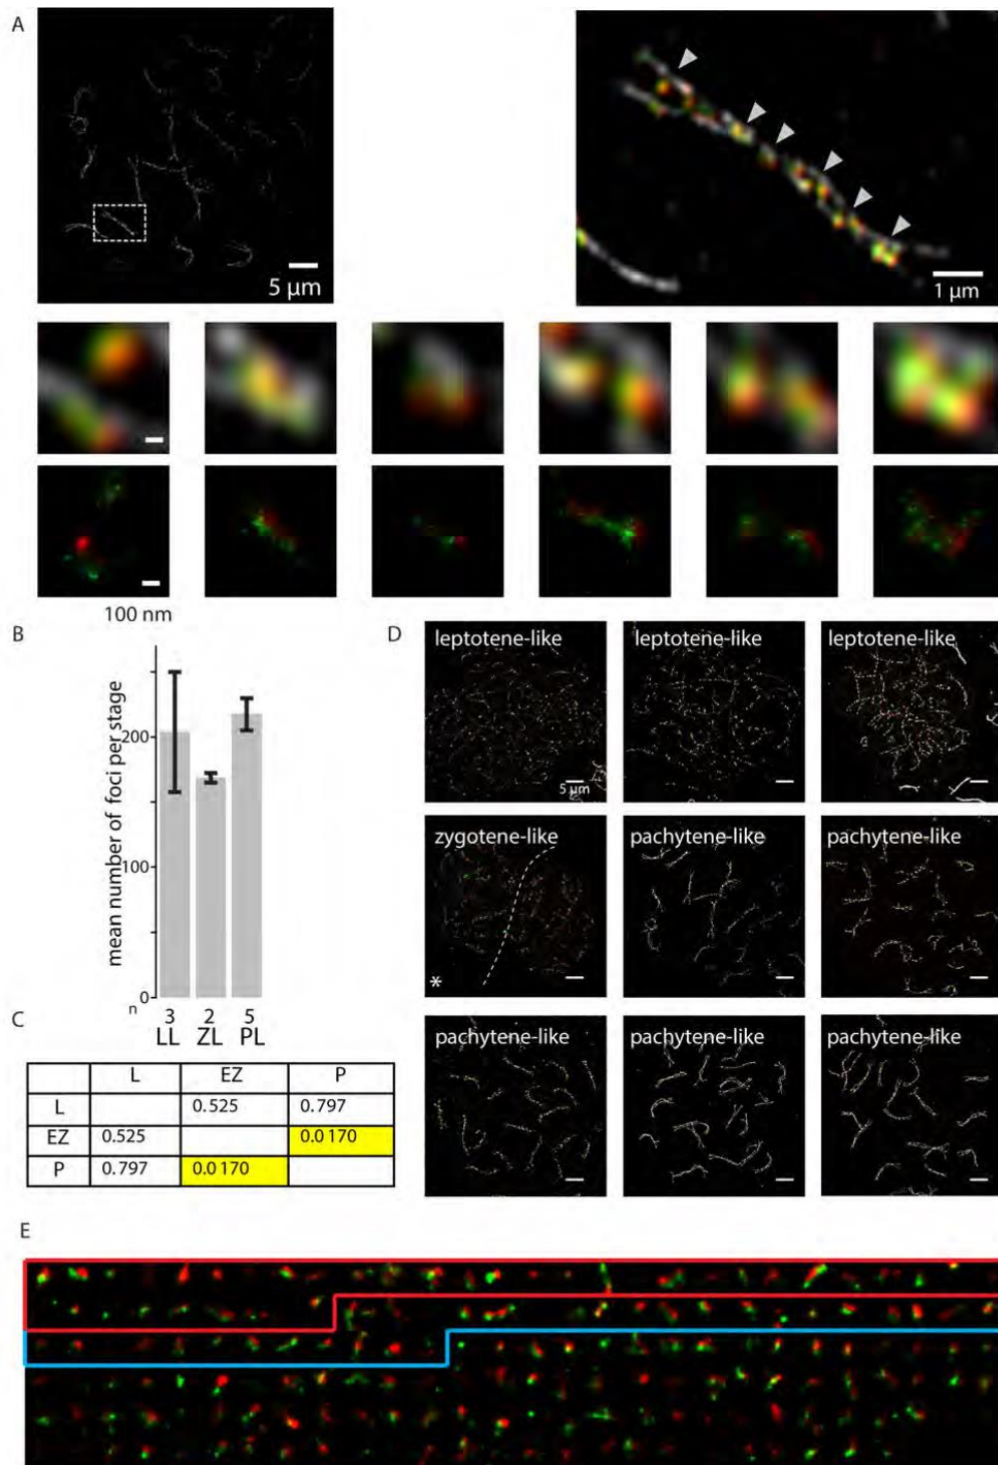

909

910 Supplemental Figure S3: Analysed *Sycp1*<sup>-/-</sup> nuclei

911 (A) 3D-SIM image of microspread pachytene-like meiotic nucleus from *Sycp1*<sup>-/-</sup> mouse  
 912 immunostained with primary antibodies for RAD51, DMC1, and SYCP3, and appropriate  
 913 secondary antibodies labelled with Alexa 488 (green), Alexa 647 (red), and Alexa 555  
 914 (white), respectively. The boxed region is shown to the right and the arrowheads mark

915 regions shown in below. (B) Bar graph showing the average number of foci from wild type  
916 spermatocyte nuclei that were analysed in dSTORM per stage (leptotene, early/late  
917 zygotene, pachytene). The number of analysed nuclei per stage is indicated underneath  
918 each bar. Error bars indicate SEM values. (C) p-values for foci number comparisons  
919 between stages (yellow background;  $p < 0.05$ , green background  $p < 0.005$ ). (D) 3D-SIM  
920 images of the *Sycp1*<sup>-/-</sup> nuclei analysed per stage. Nuclei were immunostained for RAD51  
921 (green), DMC1 (red), and SYCP3 (white). (E) A compilation of all ROIs of the left zygotene-  
922 like nucleus, ROIs are sorted by their DxRy configuration, from most frequent to rare  
923 configuration. The boxes indicated the ROIs belonging to the D1R1 (red) and D2R1 (blue)  
924 configurations. The images are reconstructed with plotted Gaussian distributions  
925 proportional to the precision of the individual localisations.

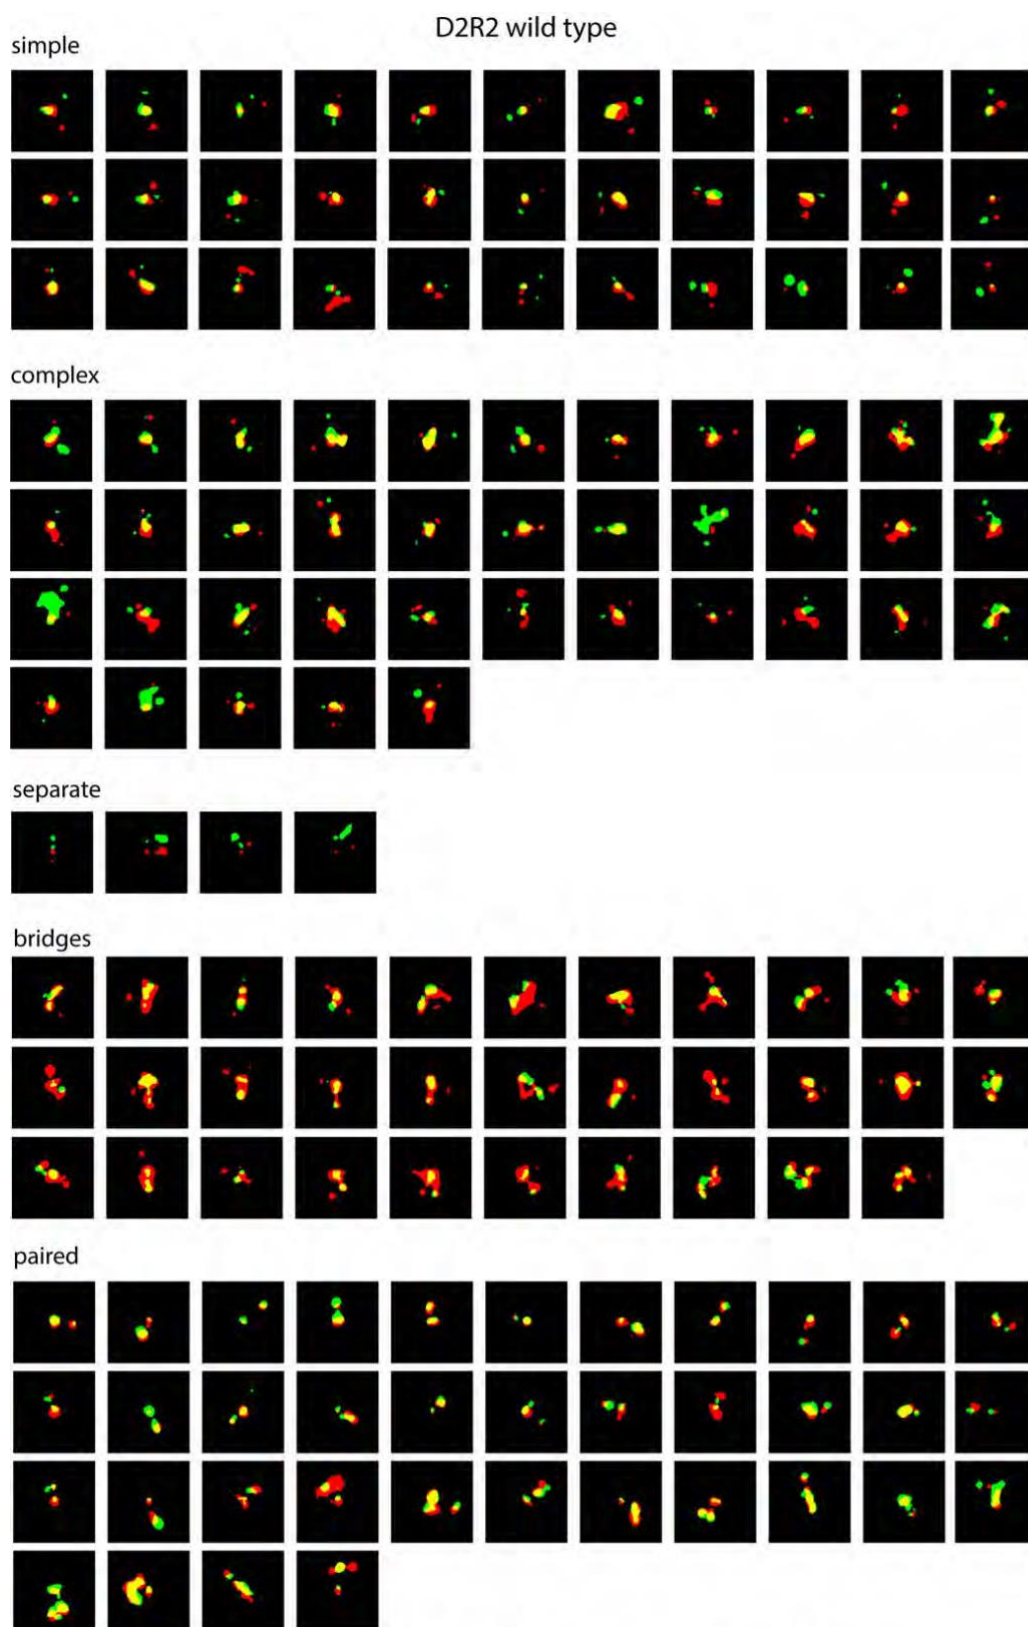

926

927 Supplemental Figure S4: Morphological classification of all wild type D2R2 foci

928 All D2R2 foci are shown, classified as described in the main text

A

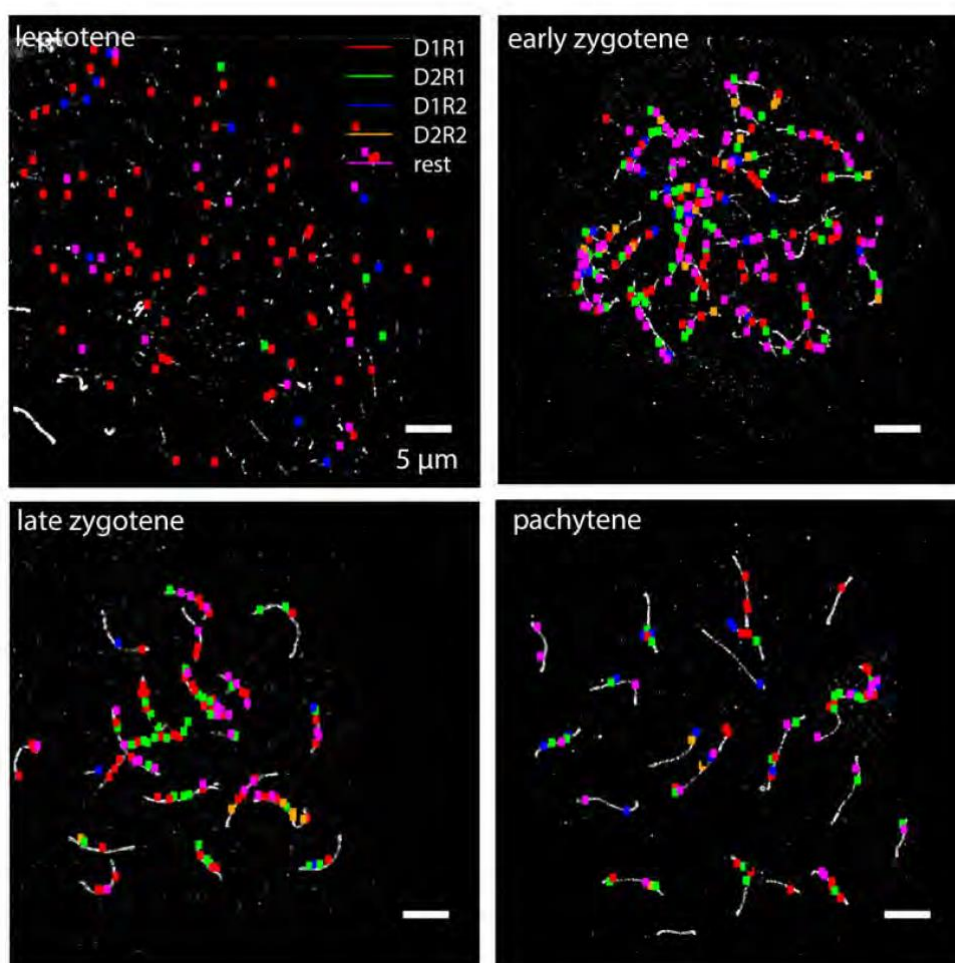

B

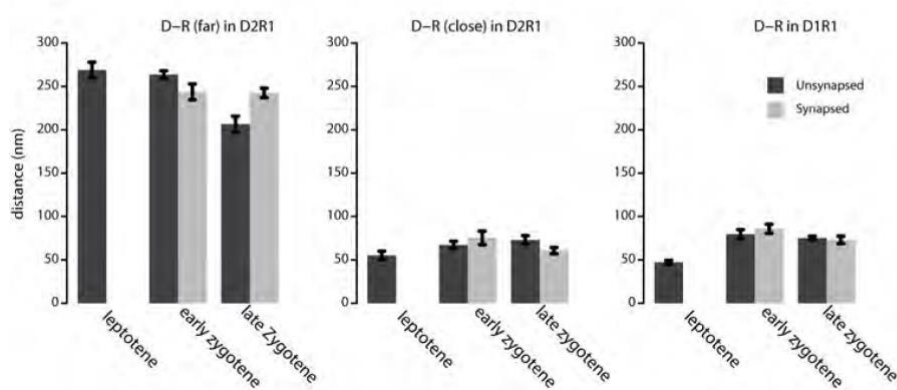

929

930 Supplemental Figure S5: Distribution of different DxRy configurations along the  
931 chromosomes of wild type spermatocytes, and analyses of distances between DMC1 and  
932 RAD51 clusters on synapsed and unsynapsed axes.

933 (A) The ROIs defined for a wild type leptotene, early zygotene, late zygotene and  
934 pachytene nucleus immunostained for RAD51, DMC1 and SYCP3 are superimposed on the  
935 SYCP3 SIM image (white). Red ROIs correspond to D1R1, green ROIs correspond to D2R1,  
936 blue ROIs to D1R2, yellow ROIs to D2R2 and magenta ROIs to the rest group of  
937 configurations. Scale bars indicate 5  $\mu$ m. (B) Mean distances between the DMC1 and  
938 RAD51 clusters in D1R1 and D2R1 configurations per stage in wild type spermatocytes,  
939 distributed over synapsed or unsynapsed axes. Error bars indicate SEM.

940

941 Supplemental Table S1:

942 This Excel file contains the data for each focus that was analysed in wild type and *Sycp1*<sup>-/-</sup>  
943 nuclei, as explained in Materials and Methods.

944

945 Supplemental Table S2:

946 This Excel file contains the areas, SD and SEM values used to generate panels C and D of  
947 Figure 4. In addition, p values are shown for the different comparisons in Figure 4,6, and

948 7.

949
